# Supplementary material for: Impact of drug diversity on treatment effectiveness in relapsing-remitting multiple sclerosis (RRMS) in Germany between 2010 and 2018: real-world data from the German NeuroTransData multiple sclerosis registry
Source: PubMed Central journal article supplement — BMJ Open. 2021 Aug 3;11(8):e042480. doi: 10.1136/bmjopen-2020-042480 (PMC8336188; doi:10.1136/bmjopen-2020-042480), 2021-08-03
Supplement: bmjopen-2020-042480.draft_revisions.pdf [file bmjopen-2020-042480.draft_revisions.pdf]

# BMJ Open

BMJ Open is committed to open peer review. As part of this commitment we make the peer review history of every article we publish publicly available.

When an article is published we post the peer reviewers' comments and the authors' responses online. We also post the versions of the paper that were used during peer review. These are the versions that the peer review comments apply to.

The versions of the paper that follow are the versions that were submitted during the peer review process. They are not the versions of record or the final published versions. They should not be cited or distributed as the published version of this manuscript.

BMJ Open is an open access journal and the full, final, typeset and author-corrected version of record of the manuscript is available on our site with no access controls, subscription charges or pay-per-view fees (<http://bmjopen.bmj.com>).

If you have any questions on BMJ Open's open peer review process please email [info.bmjopen@bmj.com](mailto:info.bmjopen@bmj.com)

# BMJ Open

## The impact of drug diversity on treatment effectiveness in relapsing-remitting multiple sclerosis (RRMS) in Germany between 2010 and 2018: real-world data from the German NeuroTransData Multiple sclerosis registry

|                               |                                                                                                                          |
|-------------------------------|--------------------------------------------------------------------------------------------------------------------------|
| Journal:                      | <i>BMJ Open</i>                                                                                                          |
| Manuscript ID                 | bmjopen-2020-042480                                                                                                      |
| Article Type:                 | Original research                                                                                                        |
| Date Submitted by the Author: | 07-Jan-2021                                                                                                              |
| Complete List of Authors:     | Braune, Stefan; NeuroTransData ,<br>Rossnagel, Fabian<br>Dikow, Heidi<br>Bergmann, Arnfin<br>Study Group, NeuroTransData |
| Keywords:                     | Multiple sclerosis < NEUROLOGY, THERAPEUTICS, Quality in health care<br>< HEALTH SERVICES ADMINISTRATION & MANAGEMENT    |
|                               |                                                                                                                          |

SCHOLARONE™  
Manuscripts

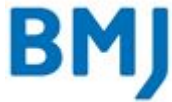

I, the Submitting Author has the right to grant and does grant on behalf of all authors of the Work (as defined in the below author licence), an exclusive licence and/or a non-exclusive licence for contributions from authors who are: i) UK Crown employees; ii) where BMJ has agreed a CC-BY licence shall apply, and/or iii) in accordance with the terms applicable for US Federal Government officers or employees acting as part of their official duties; on a worldwide, perpetual, irrevocable, royalty-free basis to BMJ Publishing Group Ltd ("BMJ") its licensees and where the relevant Journal is co-owned by BMJ to the co-owners of the Journal, to publish the Work in this journal and any other BMJ products and to exploit all rights, as set out in our [licence](#).

The Submitting Author accepts and understands that any supply made under these terms is made by BMJ to the Submitting Author unless you are acting as an employee on behalf of your employer or a postgraduate student of an affiliated institution which is paying any applicable article publishing charge ("APC") for Open Access articles. Where the Submitting Author wishes to make the Work available on an Open Access basis (and intends to pay the relevant APC), the terms of reuse of such Open Access shall be governed by a Creative Commons licence – details of these licences and which [Creative Commons](#) licence will apply to this Work are set out in our licence referred to above.

Other than as permitted in any relevant BMJ Author's Self Archiving Policies, I confirm this Work has not been accepted for publication elsewhere, is not being considered for publication elsewhere and does not duplicate material already published. I confirm all authors consent to publication of this Work and authorise the granting of this licence.

1  
2  
3 **The impact of drug diversity on treatment effectiveness in relapsing-remitting**  
4 **multiple sclerosis (RRMS) in Germany between 2010 and 2018: real-world data**  
5 **from the German NeuroTransData Multiple sclerosis registry**  
6  
7

8 **Stefan Braune, Fabia Rossnagel , Heidi Dikow, Arnfin Bergmann, NTD Study group**  
9

10  
11  
12 **Corresponding author:**  
13

14 **Prof. Dr. Stefan Braune**, Neurologist, NeuroTransData, Bahnhofstr. 103b, 86633  
15 Neuburg an der Donau, Germany  
16

17 Contact address: Neurozentrum Prien, Bernauer Str. 12, 83209 Prien  
18

19  
20 Email: [sbraune@neurotransdata.com](mailto:sbraune@neurotransdata.com)  
21

22 Phone: 0049-151 20746003  
23

24 Fax: 0049-8051-64500  
25

26 **Fabian Rossnagel**, Health economist, NeuroTransData, Bahnhofstr. 103b, 86633  
27 Neuburg an der Donau, Germany. [frossnagel@neurotransdata.com](mailto:frossnagel@neurotransdata.com)  
28

29  
30 **Heidi Dikow**, Data scientist, NeuroTransData, Bahnhofstr. 103b, 86633 Neuburg an der  
31 Donau, Germany. [hdikow@neurotransdata.com](mailto:hdikow@neurotransdata.com)  
32

33 **Dr.med. Arnfin Bergmann**, Neurologist, NeuroTransData, Bahnhofstr. 103b, 86633  
34 Neuburg an der Donau, Germany. [abergmann@neurotransdata.com](mailto:abergmann@neurotransdata.com)  
35

36  
37 **NTD Study Group**, Doctors and study nurses of the German NeuroTransData network,  
38 see [www.neurotransdata.com/praxen](http://www.neurotransdata.com/praxen)  
39  
40  
41  
42  
43  
44  
45  
46  
47  
48  
49  
50  
51  
52  
53  
54  
55  
56  
57  
58  
59  
60

## Abstract

### Objective

To evaluate the impact of drug diversity on treatment effectiveness in relapsing-remitting multiple sclerosis (RRMS) in Germany

### Design

This study employs real world data captured in-time during clinical visits in 67 German neurology outpatient offices of the NeuroTransData (NTD) MS registry between 1 Jan 2010 and 30 Jun 2019, including 237,976 visits of 17,553 RRMS patients. Adherence and clinical effectiveness parameters were analyzed by descriptive statistics, time-to-event analysis overall and by disease modifying therapies (DMTs) stratified by administration modes (injectable, oral and infusion). Three time periods were compared: 2010–2012, 2013–2015, and 2016–2018.

### Results

Between 2010 and 2018, an increasing proportion of RRMS patients were treated with DMTs and treatment was initiated sooner after diagnosis of MS. Introduction of oral DMT temporarily induced higher readiness to switch. Comparing the three index periods, there was a continuous decrease of annualized relapse rates, less frequent EDSS progression and increasing periods without relapse, EDSS worsening and with stability of no-evidence-of-disease-activity (NEDA) 2 and 3 criteria, lower conversion rates to secondary progressive MS (SPMS) on oral and on injectable DMTs.

### Conclusion

Sparked by the availability of new mainly oral DMTs, RRMS treatment effectiveness improved clinically meaningful between 2010 and 2018. As similar effects were seen for injectable and oral DMTs more than for infusions, a better personalized treatment allocation in many patients is likely. These results indicate that there is an overall beneficial effect for the whole MS patient population as a result of the greater selection of available DMTs, a benefit beyond the head-to-head comparative efficacy, resulting from an increased probability and readiness to individualize MS therapy.

## Introduction

The field of multiple sclerosis (MS) treatment have seen dynamic developments over the last three decades. 1. Since the introduction of the first interferon- $\beta$ 1a (IF-b1a) in 1994, treatment options for patients with relapsing remitting MS (RRMS) have expanded to 14 different disease modifying therapies (DMTs) registered in Europe. 2. Regulatory authorities have defined new MS subgroups such as high-disease activity course of RRMS, relapsing MS (RMS), RRMS and relapsing forms of secondary progressive MS, for the definition of drug labels 3. Regulatory authorities have also developed legislative and administrative initiatives such as the “AMNOG procedure” to control costs of drugs, in the face of drug costs in Germany raising from €30.2 billion to €43.9 billion from 2010–2018.[1] 4. Patients, physicians and payers expect allocation of the most effective DMT for the individual patient while minimizing adverse events. While reduction of relapse activity was the treatment goal in the 1990s, current treatment goals strive for “no evidence of disease activity”.

However, little is known about the impact of these developments on real-world treatment pattern and effectiveness on disease activity in RRMS. This analysis investigates treatment pattern and effectiveness over time by comparing three time periods between 2010 and 2018 (defined by availability of new DMTs entering the German market) of real-world data from the physician’s network NeuroTransData (NTD) in Germany.

## Methods

### Database: the NTD multiple sclerosis registry

This project employed real-world clinical data captured by the NeuroTransData (NTD) multiple sclerosis registry. NTD is a Germany-wide physicians’ network founded in 2008 and run by physicians in the fields of neurology and psychiatry ([www.neurotransdata.com](http://www.neurotransdata.com)). Governance principles are defined. NTD generates revenue by its members’ participation in phase II–IV clinical trials, investigator initiated trials, and real-world data analytic projects in cooperation with pharmaceutical industry, payers and other players in the German and international health systems.

Currently, 132 specialists work in 67 NTD practices throughout Germany, serving approximately 600,000 outpatients per year. Each practice is certified according to network-specific and ISO 9001 criteria. An external certified organization audits compliance annually. The NTD MS registry includes approximately 25,000 patients with MS, representing about 15% of all MS patients in Germany. NTD captures demographic, clinical history, patient-related outcomes, and clinical variables in real time during clinical visits. Standardized clinical assessments of functional system scores and EDSS calculation are performed by certified raters (<http://www.neurostatus.net>). Data are entered into the web-based registry either manually or directly from digital sources.

1  
2  
3 Data quality is monitored by the NTD data management team, checking for  
4 inconsistencies and errors using an error analysis program. Both automatic and  
5 manually executed queries are implemented to further ensure data quality, e.g. checks  
6 for inconsistencies and requests for missing information. High data completeness is  
7 achieved by definition of minimum data sets, mandatory data entry fields, positive  
8 missing data confirmation. Advanced dynamic web-based data capturing, regular  
9 training of doctors and nurses, interactive chat forum for nurses and doctors, automated  
10 and manual feedback query system, daily-automated analysis of data plausibility and  
11 correctness, and annual on-site audit of procedures and source data by an external  
12 process quality certifier organization contribute to high data consistency. The NTD data  
13 capturing platform is also used as patient management system in the daily care of  
14 patients in NTD offices, thus guaranteeing timeliness of data.  
15  
16  
17  
18  
19

20 All data are pseudonymized and pooled. The Institute for Medical Information  
21 Processing, Biometry and Epidemiology (Institut für medizinische  
22 Informationsverarbeitung, Biometrie und Epidemiologie (IBE)) at the Ludwig  
23 Maximilian University in Munich, Germany, manages codes and acts as an external trust  
24 center. Pooled data are stored on NTD servers and other NTD-controlled storage  
25 technology. This data acquisition and management protocol was approved by the ethical  
26 committee of the Bavarian Medical Board (Bayerische Landesärztekammer, June 14,  
27 2012) and re-approved by the ethical committee of the Medical Board North-Rhine  
28 (Ärztekammer Nordrhein, April 25, 2017). Compliance with European and German  
29 legislation (BDSG, EU-DSGVO) is warranted including patient rights and informed  
30 consent requirements. Patient participation, informed consent procedures, data  
31 capturing, management and analytics fulfill the “Guidelines for Good  
32 Pharmacoepidemiology Practices (GPP) of the International Society for  
33 Pharmacoepidemiology”[2], the Strengthening the Reporting of Observational Studies in  
34 Epidemiology (STROBE) guidelines[3], the European Medicines Agency requirements  
35 for the “Use of patient disease registries for regulatory purposes – methodological and  
36 operational considerations”[4] and the ethical principles laid down in the Declaration of  
37 Helsinki[5].  
38  
39  
40  
41  
42  
43  
44

45 Data for this project were captured between 1 January 2010 and 30 June 2019.  
46  
47  
48  
49

### 50 **Data quality of the NeuroTransData Multiple Sclerosis registry**

51 The main components for data quality of medical real-world data registries proposed by  
52 European Medicine Agency[4] are fulfilled by the NTD MS registry. The NTD also  
53 realizes the quality criteria of the EunetHTA REQueST (Registry Evaluation and Quality  
54 Standards Tool)[6] with 14 of 14 points in section “Methodological Information”, 23 of  
55 24 points in section “Essential Standards” and 5 of 6 points in section “Additional  
56 Requirements”.  
57  
58  
59  
60

## Data analysis

Analysis was performed in 3 time periods, reflecting different spectra of DMTs available during the respective period.

2010–2012 (index period 10–12): era of early treatment initiation at the stage of clinically isolated syndrome (CIS) with interferons and glatirameracetat and escalation with natalizumab approved since 2006 and fingolimod approved since 2011 for high-disease-activity (HDA) patients.

2013–2015 (index period 13–15): era of therapy diversification with introduction of alemtuzumab as an infusion for HDA patients, teriflunomide and dimethylfumarat as oral drugs for all stages of RRMS.

2016–2018 (index period 16–18): era of consolidated DMT spectrum. Cladribine, an oral HDA activity drug, was newly approved in August 2017. Daclizumab, which became available in July 2016, was restricted in July 2017 and withdrawn in March 2018, was not considered as numbers of patients were very small and a temporary distortion of results in the injectable group had to be excluded.

Parameters characterizing treatment acceptance and adherence were analysed for each index period.

Impact on treatment effectiveness was analyzed between 2010 and 2018 and for each index period for the strata “all DMT”, “injectables” including interferons- $\beta$ -1a, interferons- $\beta$ -1b, glatirameracetate, “orals” including fingolimod, teriflunomide, dimethylfumarate, cladribine, “infusions” including natalizumab, alemtuzumab, based on the European labels of these DMTs.

Treatment effectiveness was analysed for RRMS patients on DMT by annualized relapse rate (ARR), time-to-first-relapse on DMT, percentage of patients with 6 months confirmed disability-progression (6mCDP, CDP defined as at least 1.0-point EDSS score increases for patients with baseline EDSS score 0–5.5 EDSS and at least 0.5-point EDSS score increases for patients with baseline EDSS score greater than 5.5), time-to-6mCDP on DMT, time-from-first symptom to EDSS  $\geq$ 3-5 and  $>$ 5 (in month), time-to-no-evidence-of-disease-activity (NEDA) 2 and 3 failure on DMT being started in the index periods. Risk rates for discontinuation were calculated as ratio of number of patients with discontinuation of DMT divided by all patients.

## Patient and Public Involvement

There was no patient involvement.



## Role of funding source

This study was conducted by NTD without additional funding or guidance by external sponsors.

## Results

### Data Quality

Exemplary frequencies of data captured constantly over time for several data items (see Table 1) underline the high data quality and consistency over time. The mean duration of follow-up was 5.07 years (SD 4.46). A total of 59,928 DMT treatment cycles were documented between 2010 and 2018.

**Table 1.** Numbers of patients with RRMS, visits per year and therapy cycles with DMTs captured in the NTD MS registry between 2010 and 2018. DMT, disease-modifying treatment; MRI, magnetic resonance imaging; RRMS, relapsing remitting multiple sclerosis.

| Index year        | Number RRMS patients | Visits documented per year | DMT cycles per year | Relapses per year | MRI per year |
|-------------------|----------------------|----------------------------|---------------------|-------------------|--------------|
| 2010              | 5,170                | 16,377                     | 4,168               | 1,821             | 3,096        |
| 2011              | 6,648                | 24,296                     | 5,441               | 2,638             | 4,004        |
| 2012              | 7,017                | 23,298                     | 5,893               | 2,600             | 3,107        |
| 2013              | 7,532                | 25,840                     | 6,410               | 2,433             | 3,866        |
| 2014              | 7,591                | 28,261                     | 7,536               | 2,076             | 3,989        |
| 2015              | 8,074                | 28,313                     | 7,443               | 1,972             | 3,879        |
| 2016              | 8,401                | 29,715                     | 7,566               | 1,795             | 3,781        |
| 2017              | 9,021                | 31,199                     | 7,862               | 1,707             | 3,575        |
| 2018              | 8,946                | 30,677                     | 7,609               | 1,487             | 4,102        |
| 2010–2018         | 68,400               | 237,976                    | 59,928              | 18,529            | 33,399       |
| Mean/patient/year |                      | 3.48                       | 0.88                | 0.27              | 0.49         |

## Patient Population

A total of 17,553 patients with RRMS were included (73.6% female, 26.4% male). Mean age at diagnosis of RRMS was 34 years (SD 10.66), mean annualized relapse rate between 2010 and 2018 was 0.27 (SD 0.6). Table 2 shows consistency and completeness of data in the three time periods between 2010 and 2018.

**Table 2.** Means and percentages of RRMS patient characteristics of the NTD MS registry in time periods between 2010 and 2018 at initiation of DMT (=index event). DMT, disease-modifying therapy MRI, magnetic resonance imaging; RRMS, relapsing remitting multiple sclerosis; SD, standard deviation.

| Characteristic                             | 10-12<br>(N=3,942) | 13-15<br>(N=5,101) | 16-18<br>(N=3,138) | All patients<br>(N=12,181) |
|--------------------------------------------|--------------------|--------------------|--------------------|----------------------------|
| Female, %                                  | 73.17              | 73.74              | 26.26              | 73.07                      |
| Age, years (SD)                            | 44.95 (10.21)      | 43.93 (10.88)      | 40.7 (11.03)       | 43.59 (10.94)              |
| EDSS (SD)                                  | 2.12 (1.59)        | 2.10 (1.62)        | 1.89 (1.53)        | 2.05 (1.59)                |
| Relapses before index event (SD)           | 1.93 (2.55)        | 2.26 (2.63)        | 2.21 (2.67)        | 2.14 (2.62)                |
| Months MS duration (SD)                    | 87.78 (85.87)      | 101.78 (93.62)     | 98.73 (94.99)      | 96.46 (91.75)              |
| DMTs before index event (SD)               | 0.8 (1.01)         | 1.08 (1.14)        | 1.2 (1.26)         | 1.02 (1.14)                |
| MRI around index event, %                  | 39.93              | 43.5               | 37.38              | 40.77                      |
| MRI with progression around index event, % | 20.83              | 20.78              | 18.36              | 20.17                      |

## Treatment acceptance

Overall proportions of RRMS patients actively treated with DMT increased steadily: 10-12, 70,7%; 13-15, 78.1%; 16-18, 80,1%. Proportions of DMT types by application changed during the 3 time periods 10-12/13-15/16-18 with percentages of patients on injectables 88/69/46, orals 13/44/54, infusions 12/10/10. Proportions of RMS patients receiving so-called high-disease activity DMTs increased continuously: 10-12, 23%; 13-15, 27%; 16-18, 31%.

## Initiation of DMT after diagnosis of RRMS

More patients started on a DMT within 6 months after diagnosis of RRMS (10-12, 62%; 13-15, 72%; 16-17, 66%), with shorter periods between first symptom and initiation of first DMT (10-12, 178  $\pm$ 295 days; 13-15, 121  $\pm$ 174 days; 16-18, 115  $\pm$ 112 days). Orals were increasingly preferred as first DMT as they became available during the 3 periods

1  
2  
3 of time 10–12/13–15/16–18 with percentages of patients on injectables 74/44/40,  
4 orals 19/52/55, infusions 7/4/5.  
5  
6  
7

### 8 **Persistence on DMT**

9  
10  
11 Availability of oral DMT increased the proportion of switches between DMTs from 16%  
12 of patients on treatment in 10–12 to 24% in 13–15, while in 16–18, 14% of patients on  
13 DMT switched. In parallel, time to discontinuation remained stable within these 3-years  
14 periods: in 10–12 mean time to discontinuation 8.49 months (SD 7.14); in 13–15, 8.10  
15 months (SD 6.92); and in 16–18, 8.49 months (SD 7.71). There was a trend for patients  
16 staying longer on overall treatment for the most recent time period . This trend was  
17 driven by longer persistence of patients on infusion therapies in the most recent time  
18 period (Figure 1).  
19  
20  
21  
22  
23  
24

25 **Figure 1.** Time to discontinuation of DMTs in RRMS patients for time periods 2010–  
26 2012, 2013–2015, 2016–2018, all DMT (A) and by injectables (B), orals (C), infusions  
27 (D). DMT, disease-modifying treatments; RRMS, relapsing remitting multiple sclerosis  
28

29  
30 A. all DMT  
31

32  
33  
34 B Injectables  
35

36  
37  
38 C Orals  
39

40  
41  
42 D Infusions  
43  
44  
45  
46  
47  
48

49 Non-medical reasons for discontinuation, such as patients' perceptions and wishes,  
50 decreased over time from 71 to 51%. Lack of effectiveness is increased as a motivation  
51 for switching DMTs, as well as adverse events or pregnancy/family planning (Table 3).  
52  
53  
54  
55  
56  
57  
58  
59  
60

**Table 3. Reasons overall and risk rates by application type of DMT for discontinuation for three time periods 2010–2012, 2013–2015, and 2016–2018.**

Non-medical reasons summarize patients' perceptions and wishes. DMT, disease-modifying treatment; NA, not applicable as criteria was not captured.

| <b>Reasons for discontinuation, %</b> | <b>10–12</b> | <b>13–15</b> | <b>16–18</b> |
|---------------------------------------|--------------|--------------|--------------|
| Antibodies/JCV-virus titer            | 1.28         | 1.85         | 1.51         |
| family planning                       | 4.10         | 5.48         | 6.34         |
| Adverse events                        | 5.13         | 15.89        | 13.12        |
| Lack of effectiveness                 | 18.21        | 19.31        | 27.90        |
| Freedom of disease activity           | NA           | 0.34         | 0.36         |
| Non-medical reasons                   | 71.28        | 57.11        | 50.76        |
| <b>Risk rates for discontinuation</b> |              |              |              |
| Injectables                           | 0.59         | 0.54         | 0.33         |
| Orals                                 | 0.39         | 0.36         | 0.21         |
| Infusions                             | 0.59         | 0.37         | 0.17         |

Risk rates for discontinuation decreased continuously for all types of DMT over the three time periods, reaching a decrease of 44% for injectables, 46% for orals and 71% for infusions between 2010–2012 and 2016–2018.

### DMT switching pattern

Patients increasingly switched from injectables to oral infusion DMTs, while switches to injectables decreased. Follow-on DMTs after oral DMTs were predominantly oral DMT. If infusion therapy was discontinued, almost all patients continued with oral DMTs (see Figure 2).

**Figure 2.** Percentage of switches between injectable, oral and infusion DMTs in RRMS for time periods A) 2010–2012, B) 2013–2015, C) 2016–2018. DMT, disease-modifying therapy; RRMS, relapsing remitting multiple sclerosis.

A

B

C

## Treatment effectiveness

### Relapse activity

Annualized relapse rate (ARR) decreased by a mean 39% overall, 40% for injectables and 30% for orals. Infusion therapies did not decrease (Figure 3).

**Figure 3:** Annualized relapse rate in three time periods 2010–2012, 2013–2015, 2016–2018 on DMT overall and by application type. DMT, disease-modifying therapy.

Proportions of patients documented with 6mCDP, with progression of EDSS <3 to ≥3–5 as well as from EDSS <5 to ≥5 decreased by 39% and 23%, respectively, between the first and the last time period analyzed. In parallel, times from first symptom of RRMS to reach the defined EDSS ranges increased by 22% and 15% respectively (see Table 4).

**Table 4.** Six months confirmed disability progression (6m CDP. EDSS increase of ≥1.0 for patients from previous EDSS): proportion of patients reaching EDSS ≥3 to 5, reaching EDSS ≥5 and months from first symptom of RRMS to 6mCDP in these strata.

|                                          | EDSS <3 to | EDSS <5 to | Months to 6mCDP |       | Months to 6mCDP |        |
|------------------------------------------|------------|------------|-----------------|-------|-----------------|--------|
|                                          | ≥3–<5      | ≥5         | EDSS ≥3-5       |       | EDSS ≥5         |        |
|                                          | % patients | % patients | Mean            | SD    | Mean            | SD     |
| <b>10–12</b>                             | 1.02       | 0.26       | 122.30          | 81.03 | 181.59          | 92.17  |
| <b>13–15</b>                             | 0.76       | 0.31       | 130.95          | 85.60 | 181.37          | 110.04 |
| <b>16–18</b>                             | 0.62       | 0.20       | 149.26          | 93.32 | 209.73          | 97.70  |
| <b>Difference from 10–12 to 16–18, %</b> | -39        | -23        | +22             |       | +15             |        |

### Maintenance of NEDA 2 and 3 criteria

There was a clear trend that patients who initiated DMTs for a minimum of 3 months in these index periods remained more frequently and longer free of disease activity according to NEDA 2 (no relapse, no 6mCDP) and NEDA 3 (no relapse, no 6mCDP, no MRI progression) criteria over the three periods of time (Figure 4).

1  
2  
3 **Figure 4.** A. Time to failure of no-evidence-of disease-activity (NEDA) 2 (no relapse, no  
4 confirmed disability progression) and B. NEDA 3 (no relapse, no 6months confirmed  
5 disability progression, no MRI worsening) criteria in RRMS patients on DMTs after a  
6 minimum treatment period of 3 months with treatment initiation within three time  
7 periods 2010–2012, 2013–2015, 2016–2018. DMT, disease-modifying treatment; MRI,  
8 magnetic resonance imaging; RRMS, relapsing remitting multiple sclerosis.  
9  
10  
11  
12  
13

14 A.

15  
16  
17  
18 B.  
19  
20  
21  
22  
23  
24

25 Mean times to NEDA 2 and 3 failure, censored for the 3 time periods, increased  
26 continuously. NEDA 2: 10–12, 6.92 months (SD 6.66); 13–15, 7.10 months (SD 6.55);  
27 16–18, 7.43 months (SD 7.11). NEDA 3: 10–12, 6.70 months (SD 6.41); 13–15, 7.16  
28 months (SD 6.42); 16–18, 7.49 months (SD 6.89).  
29  
30  
31  
32

### 33 Progression to SPMS

34  
35 Between 2010 and 2018, overall 2.34% of 176,553 patients switched from RRMS to  
36 SPMS during a mean follow-up time of 5.31 years. The mean time from first symptom of  
37 MS to SPMS was 214 months (SD 113.77), almost 18 years. Time-to-progression analysis  
38 did not reveal time differences between the 3 index time periods (not shown here).  
39 There was a continuous trend towards lower numbers of patients switching to SPMS  
40 while on DMT for at least 12 months from 4.25% in 10–12, to 1.97% in 13–15, and to  
41 1.46% in 16–18.  
42  
43  
44  
45  
46  
47  
48  
49  
50  
51  
52  
53  
54  
55  
56  
57  
58  
59  
60

## Discussion

Medical guidelines, regulatory processes and public discussion in Germany and other countries regarding clinical benefits, treatment strategies and drug pricing are often focused on results from the randomized controlled trial (RCT) with an active comparator and versus placebo that led to registration of the drug[7]. However, clinical usage in a broad natural spectrum of patients and the increasing complexity of treatment options are causing a knowledge gap that RCTs are unable to fill. [Thus, qualified real-world-data (RWD) are increasingly employed to evaluate optimization of therapeutic strategies[8-11]. Translating DMT efficacy studies into evidence-based clinical practice by meta-analysis of 123 unique RRMS studies was extremely limited. One main limitations was the paucity of efficacy data beyond 3 years of treatment[12]. Other initiatives addressed methodological aspects of this efficacy–effectiveness gap between results of RCTs in selected patient groups and effectiveness in real-world usage[13]. This is the first study to address population effects of a series of newly introduced DMTs in RRMS on adherence and clinical effectiveness.

Transparent data quality is the key stone of any scientific project. The physician-owned NTD MS registry can demonstrate constant data density, including a mean of 3.5 patient visits documented over the last 9 years, based on a defined minimal dataset and high data quality. This was achieved by utilization of web-based in-time data capturing and continuous development of automated and manual quality assurance measures for capturing data from 8,000 to 9,000 RRMS outpatients per year in Germany.

Definition criteria of the three time periods chosen for this study are thought to reflect periods characterized by different sets of DMTs being available for the treatment of RRMS patients. Between 2010 and 2018 the broader spectrum, in particular of oral DMTs motivated more patients to initiate DMT treatment and start earlier after diagnosis of RRMS. Availability of oral DMTs temporarily increased switches between DMTs in the years after their introduction from 16% in 2010–2012 to 24% of patients on DMT in 2013–2015, with a decline back to 14% of patients switching between 2016 and 2018. This is also reflected in the time-to-discontinuation analysis, showing more frequent and quicker discontinuation of injectables in 2013–2015. Lack of effectiveness and adverse events may have gained in importance over time as reasons for discontinuation of DMT, mirroring increasing expectations of doctors and patients regarding benefit/risk of DMTs. Persistence on classes of DMTs after 3 years improved most noticeable for infusions in 2010–2012 moving from 50% to almost 80% in 2015–2018, injectables increasing from less than 10% to 60% and orals achieving stable persistence of about 72%. Risk rates for discontinuation decreased overall and for each application type.

Earlier initiation of treatment and more readiness to search for individual optimal therapy by switching between a greater diversity of drugs may have impacted treatment effectiveness. ARR decreased overall and for patients on injectables and orals approximately 30–40% between 2010–2012 and 2016–2018. However, there was no



1  
2  
3 change in ARR over time for infusions. Furthermore, worsening of disability could be  
4 controlled better in parallel. The proportion of patients with EDSS reaching total sum  
5 scores >3 and > 5 decreased by 39% and 23%, respectively, and times from diagnosis to  
6 the 6mCDPs increased by 22 and 15%, respectively, when comparing time periods  
7 2010–2012 and 2016–2018.  
8  
9

10 Comparing treatment cycles initiated in these 3 time periods, these positive  
11 developments are also reflected by continuously increasing proportions of patients  
12 maintaining NEDA 2 and NEDA 3 criteria. In addition, proportions of patients on DMT  
13 switching from RRMS to SPMS decreased each time period, but mean times to SPMS  
14 from diagnosis of RRMS remained unchanged.  
15  
16  
17

18 The parallel improvements of reduction in ARR and disability progression, longer  
19 maintenance of NEDA 2 and 3 status in all types of DMTs, independent of their  
20 application modes, indicate that the broader selection of DMTs enable a better  
21 individual disease control in RRMS. It can be reasonably assumed that the regulatory  
22 introduced definition of high-disease-activity-labels further supported a more stringent  
23 application of the therapeutic options available. As expected, better treatment is  
24 associated with longer persistence. The observation that more efficient therapies  
25 achieved lower relapse activity in parallel with slower disability progression and longer  
26 persistence on DMTs is in line with a previous MSBase registry-based report in smaller  
27 groups of RRMS patients with advanced EDSS scores between 3 and 6[14], as well as  
28 more recent data in earlier disease stages[15]. Beside the individual patient's fate, this is  
29 of great socioeconomic relevance, as costs and utility in MS are highly correlated with  
30 disease severity[16] and progression inducing disease activity[17]. In contrast,  
31 continuing interferon- $\beta$  and glatirameracetate therapy 10 years or longer without  
32 optimization of therapy in response to disease activity results in an inevitable, almost  
33 linear increase in mean EDSS[18].  
34  
35  
36  
37  
38  
39

40 This study demonstrates a clinically meaningful, population-based benefit resulting  
41 from the availability of a broader selection of DMTs over time. The introduction of oral  
42 DMTs sparked a dynamic development between 2013 and 2015 with temporarily higher  
43 proportions of DMT switches but also more readiness to initiate DMTs earlier after  
44 diagnosis of MS. The similar extent of improvement of effectiveness parameter for oral  
45 and injectable DMTs demonstrates that this population effect is based on a more  
46 effective personalized allocation in individual patients.  
47  
48  
49

50 Overall, these results indicate that there is an overall beneficial effect for the whole MS  
51 patient population as a result of the greater selection of available DMTs, a benefit  
52 beyond the head-to-head comparative efficacy, resulting from an increased probability  
53 and readiness to individualize MS therapy. Nevertheless, the challenge in daily practice  
54 is the quick identification of the individually most effective DMT at a given time during  
55 the course of MS, particularly in patients with persistent disease activity on their current  
56 DMT, especially regarding the immanent risk of developing SPMS. Promising techniques  
57 emerge based on biomarker like neurofilament light chain[19] or B-cell activity  
58  
59  
60



response[20] or real-world-data-based statistical predictive algorithms[21]. As treatment decisions are driven currently by European label definitions, national cost control regulations and perceptions of physicians and patients, personalized-data-based decision support is required to further improve individual care.

## References

1. Statista 2020. <https://de.statista.com/statistik/daten/studie/158096/umfrage/pharmagesamtmarkt-umsatzentwicklung-seit-2006/>
2. Public Policy Committee, International Society of Pharmacoepidemiology. Guidelines for good pharmacoepidemiology practice (GPP). *Pharmacoepidemiology and drug safety* 2016;25:2–10.
3. von Elm E, Altman DG, Egger M, *et al.* The Strengthening the Reporting of Observational Studies in Epidemiology (STROBE) statement: guidelines for reporting observational studies. *Lancet*. 2007;370(9596):1453-7.
4. The Cross-Committee Task Force on Patient Registries. Discussion paper: Use of patient disease registries for regulatory purposes – methodological and operational considerations. *EMA/763513/2018*. [https://www.ema.europa.eu/documents/other/discussion-paper-use-patient-disease-registries-regulatory-purposes-methodological-operational\\_en.docx](https://www.ema.europa.eu/documents/other/discussion-paper-use-patient-disease-registries-regulatory-purposes-methodological-operational_en.docx).
5. World Medical Association. WMA Declaration of Helsinki – Ethical Principles for Medical Research Involving Human Subjects. <https://www.wma.net/policies-post/wma-declaration-of-helsinki-ethical-principles-for-medical-research-involving-human-subjects/>
6. European Network for Health Technology Assessment. REQueST® tool and its Vision paper. Public Consultation. <https://eunethta.eu/request-tool-and-its-vision-paper-are-now-available-for-public-consultation/>
7. Wieseler B, McGauran N, Kaiser T. New drugs: where did we go wrong and what can we do better? *BMJ* 2019;366:l4340.
8. Paolicelli D, Lucisano G, Manni A, *et al.* Retrospectively acquired cohort study to evaluate the long-term impact of two different treatment strategies on disability outcomes in patients with relapsing multiple sclerosis (RE.LO.DI.MS): data from the Italian MS Register. *J Neurol*. 2019;266(12):3098-3107.
9. Boremalm M, Juto A, Axelsson M, *et al.* Natalizumab, rituximab and fingolimod as escalation therapy in multiple sclerosis. *Eur J Neurol*. 2019;26(8):1060-1067.
10. Braune S, Grimm S, van Hövell P, *et al.* Comparative effectiveness of delayed-release dimethyl fumarate versus interferon, glatiramer acetate, teriflunomide, or fingolimod: results from the German NeuroTransData registry. *J Neurol*. 2018;265(12):2980-2992.
11. Kalincik T, V. Jokubaitis, T. Spelman, *et al.* Cladribine versus fingolimod, natalizumab and interferon  $\beta$  for multiple sclerosis. *Mult. Scler* 2018;24(12):1617-1626.
12. Claflin SB, Broadley S, Taylor BV. The effect of disease modifying therapies on disability progression in multiple sclerosis: a systematic overview of meta-analyses. *Front. Neurol* 2019;9: article 1150.
13. Egger M, Moons KGM, Fletcher C. GetReal: from efficacy in clinical trials to relative effectiveness in the real world. *Research Synthesis Methods* 2016;7(3):278-281.
14. Lizak N, Lugaesi A, Alroughani R, *et al.* Highly active immunomodulatory therapy ameliorates accumulation of disability in moderately advanced and advanced multiple sclerosis. *J Neurol Neurosurg Psychiatry* 2017;88:196–203.

- 1  
2  
3 15. Lublin FD, Baier M, Cutter G. Effect of relapses on development of residual deficit in  
4 multiple sclerosis. *Neurology* 2003;61:1528–32.  
5 16. Kobelt G, Thompson A, Berg J, *et al.* M. New insights into the burden and costs of multiple  
6 sclerosis in Europe. *Multiple Sclerosis Journal* 2017;23(8):1123–1136  
7 17. Ness NH, Schriefer D, Haase R, *et al.* Differentiating societal costs of disability worsening  
8 in multiple sclerosis. *J Neurol* 2019. [Epub ahead of print]  
9 18. Palace J, Duddy M, Lawton M, *et al.* Assessing the long-term effectiveness of  
10 interferonbeta and glatiramer acetate in multiple sclerosis: final 10-year results from the  
11 UK multiple sclerosis risksharing scheme. *J Neurol Neurosurg Psychiatry* 2019;90:251–  
12 260.  
13 19. Kuhle J, Kropshofer H, Haering DA, *et al.* Blood neurofilament light chain as a biomarker  
14 of MS disease activity and treatment response. *Neurology* 2019;92:e1007-e1015.  
15 20. Tacke S, Braune S, Rovituso DM, *et al.* In vivo B-cell activity predicts response to  
16 treatment with glatiramer acetate and interferons in patients with relapsing-remitting  
17 multiple sclerosis (RRMS). *Neurology: Neuroimmunology & Neuroinflammation* 2021; in  
18 print  
19 21. Stuehler E, Braune S, Lionetto F, *et al.* Framework for personalized prediction of  
20 treatment response in relapsing remitting multiple sclerosis. *BMC Medical Research*  
21 *Methodology* 2020;20(1):24.  
22  
23  
24  
25  
26  
27  
28  
29  
30  
31  
32  
33  
34  
35  
36  
37  
38  
39  
40  
41  
42  
43  
44  
45  
46  
47  
48  
49  
50  
51  
52  
53  
54  
55  
56  
57  
58  
59  
60

A.

Time to Discontinuation - All Application Types

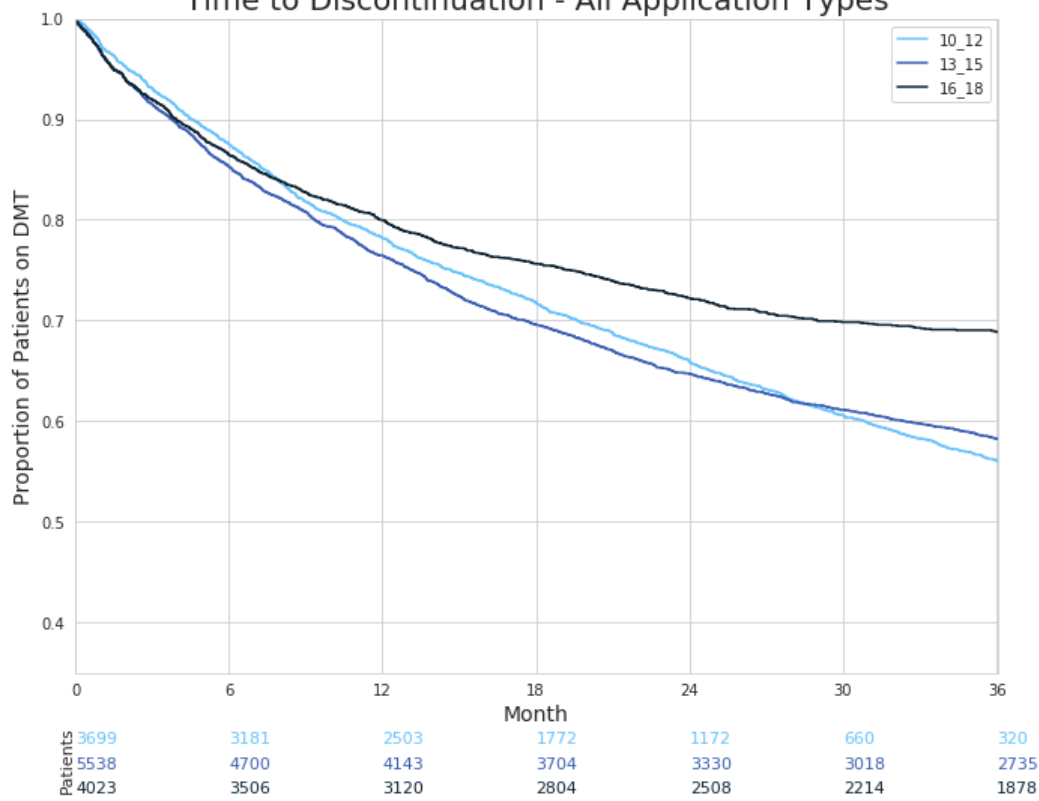

B.

Time to Discontinuation - Injectables

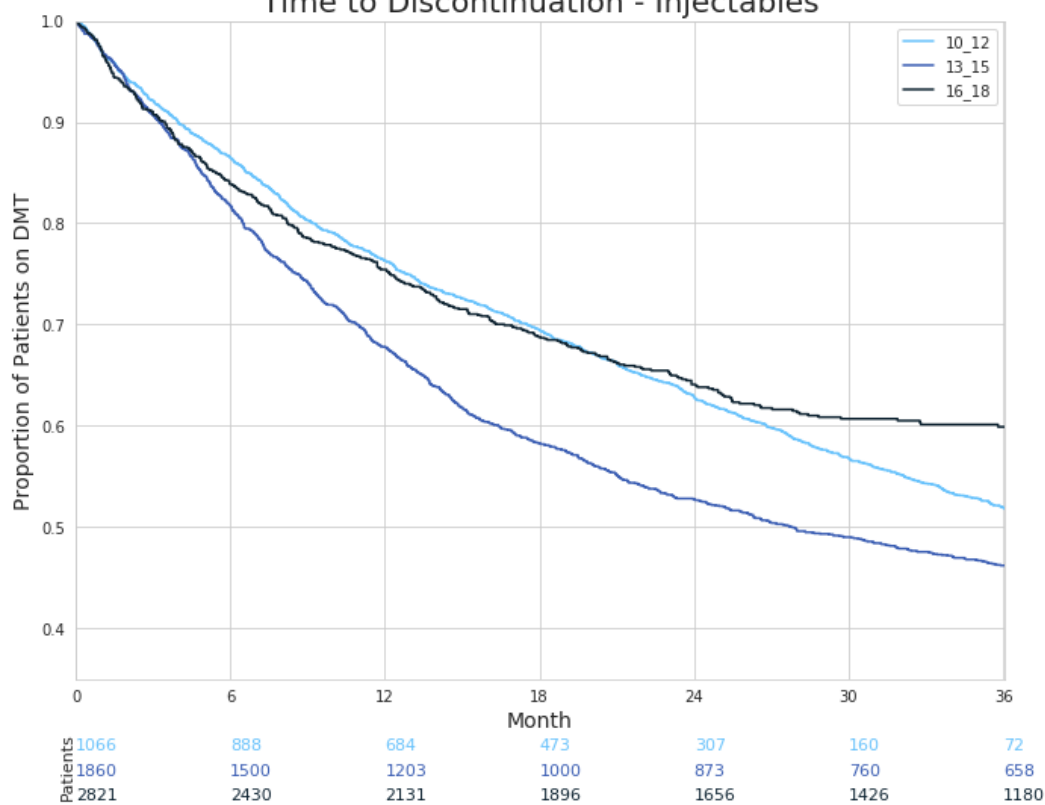

C.

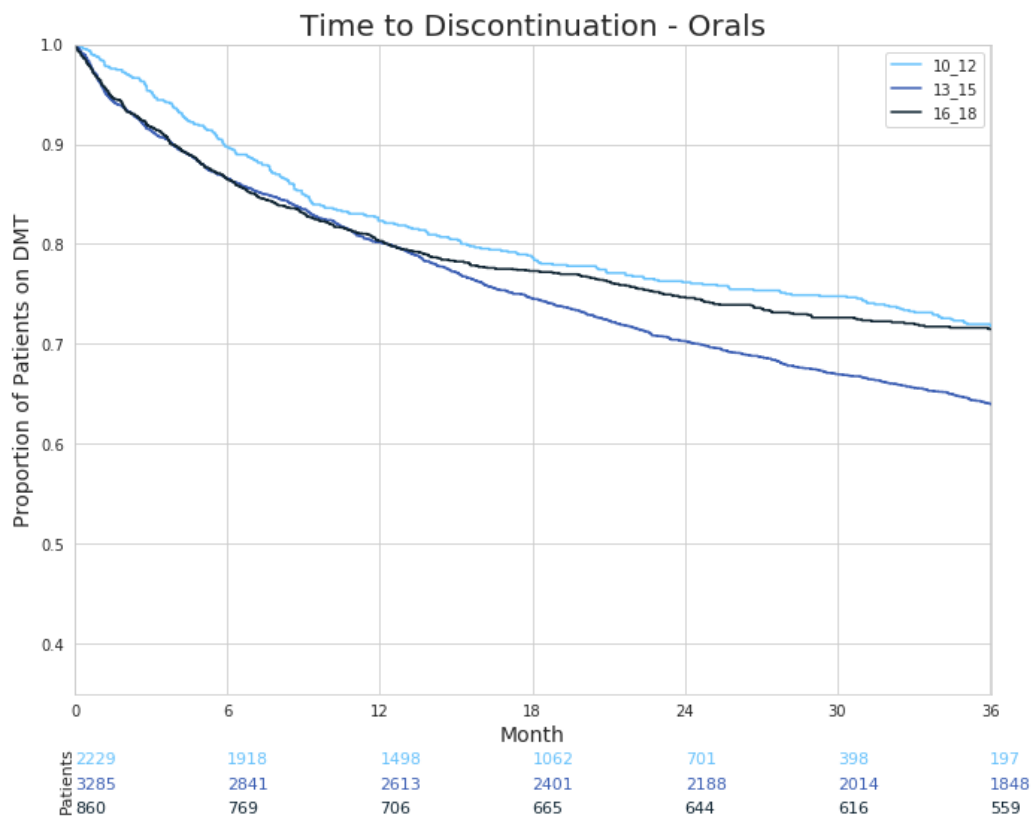

D.

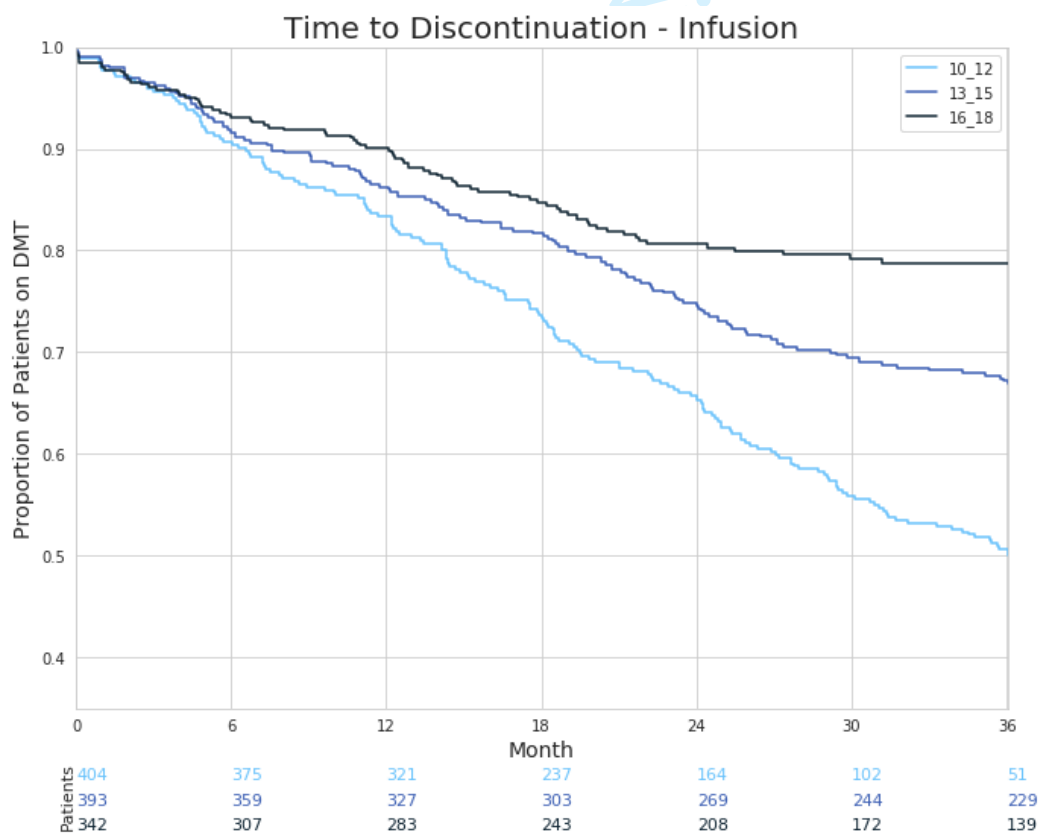

1  
2  
3  
4  
5  
6  
7  
8  
9  
10  
11  
12  
13  
14  
15  
16  
17  
18  
19  
20  
21  
22  
23  
24  
25  
26  
27  
28  
29  
30  
31  
32  
33  
34  
35  
36  
37  
38  
39  
40  
41  
42  
43  
44  
45  
46  
47  
48  
49  
50  
51  
52  
53  
54  
55  
56  
57  
58  
59  
60

A.

Switchers in Index Period: 10\_12

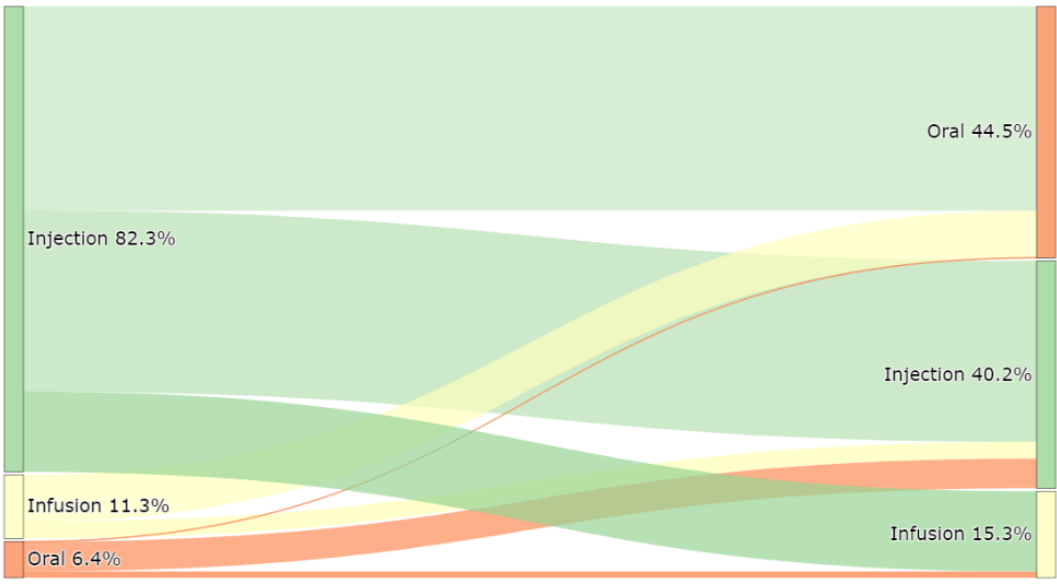

B.

Switchers in Index Period: 13\_15

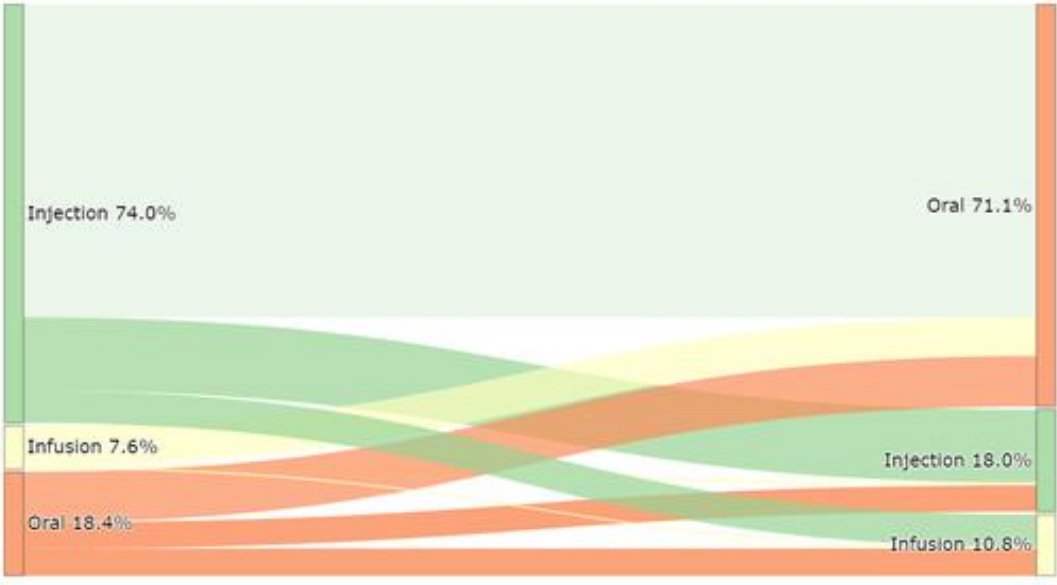

C.

Switchers in Index Period: 16\_18

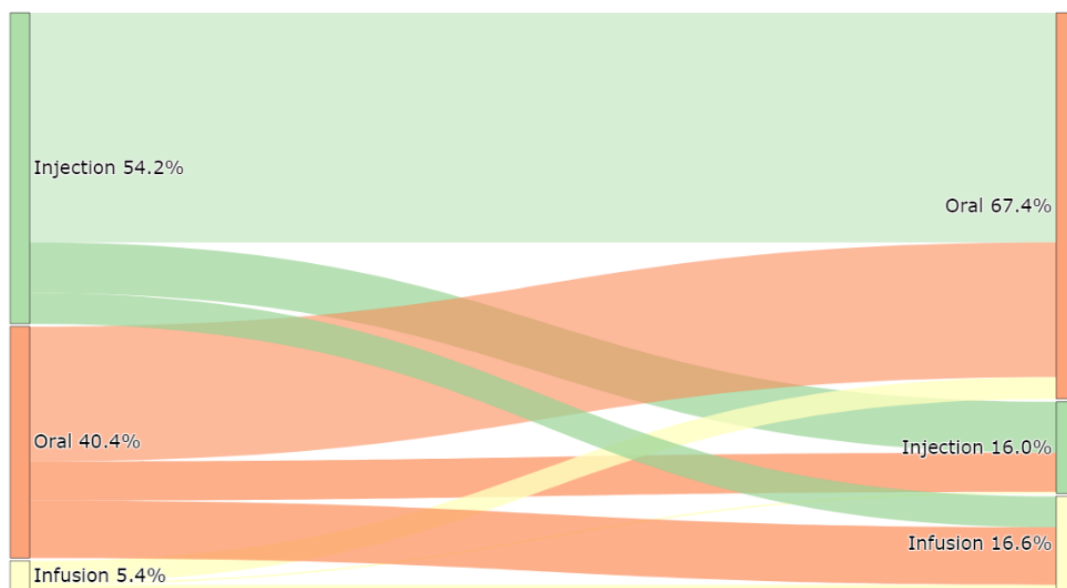

review only

1  
2  
3  
4  
5  
6  
7  
8  
9  
10  
11  
12  
13  
14  
15  
16  
17  
18  
19  
20  
21  
22  
23  
24  
25  
26  
27  
28  
29  
30  
31  
32  
33  
34  
35  
36  
37  
38  
39  
40  
41  
42  
43  
44  
45  
46  
47  
48  
49  
50  
51  
52  
53  
54  
55  
56  
57  
58  
59  
60

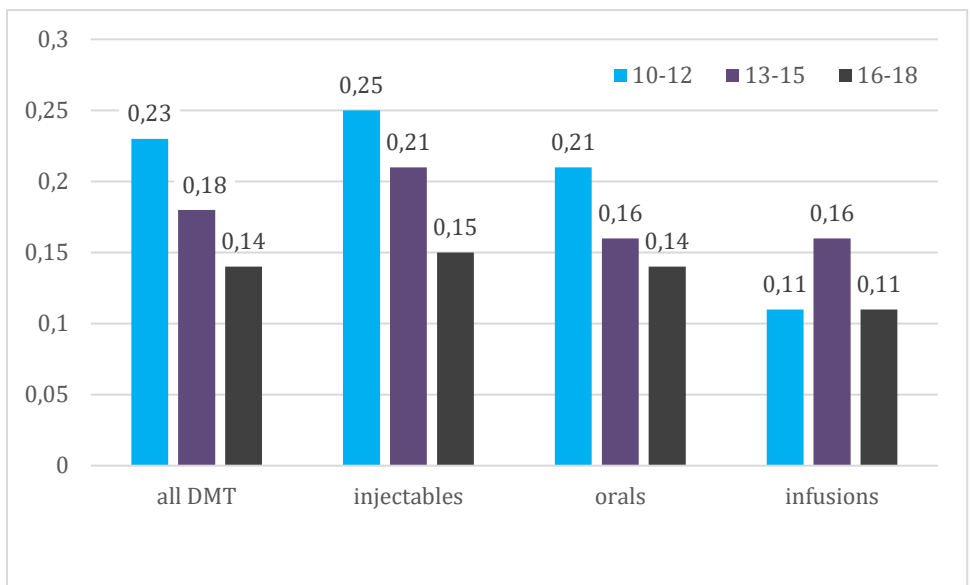

For peer review only

A.

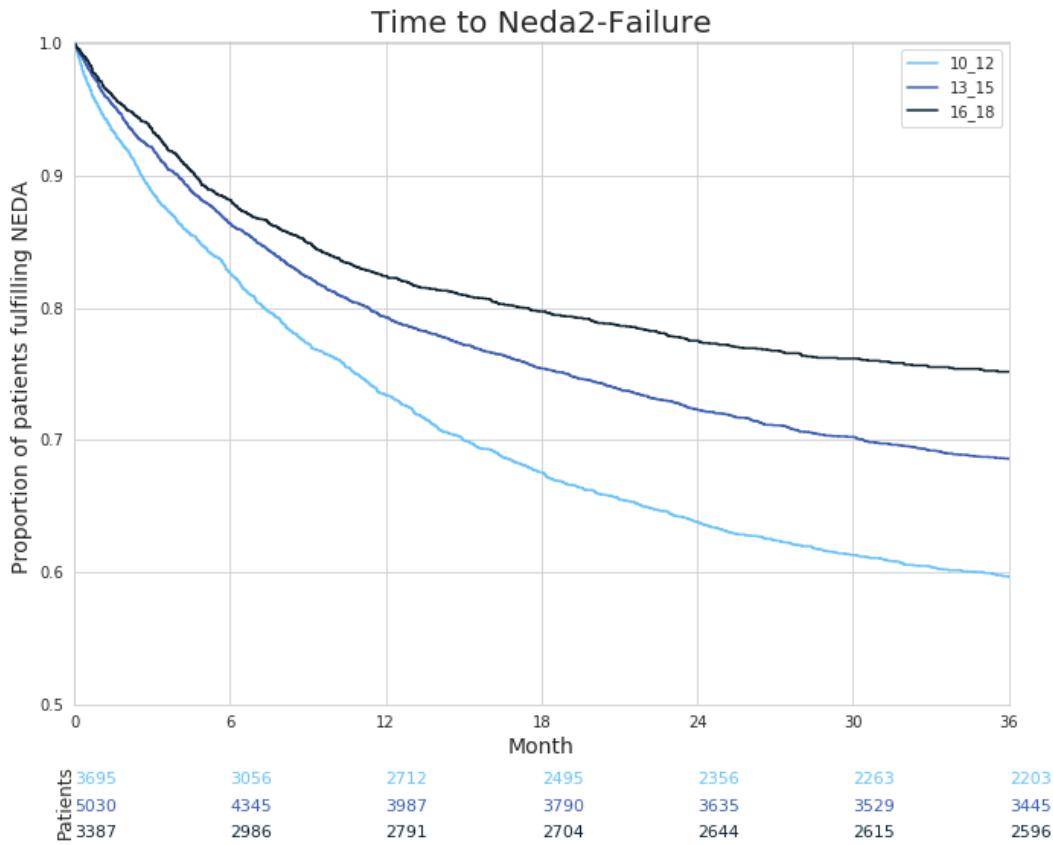

B.

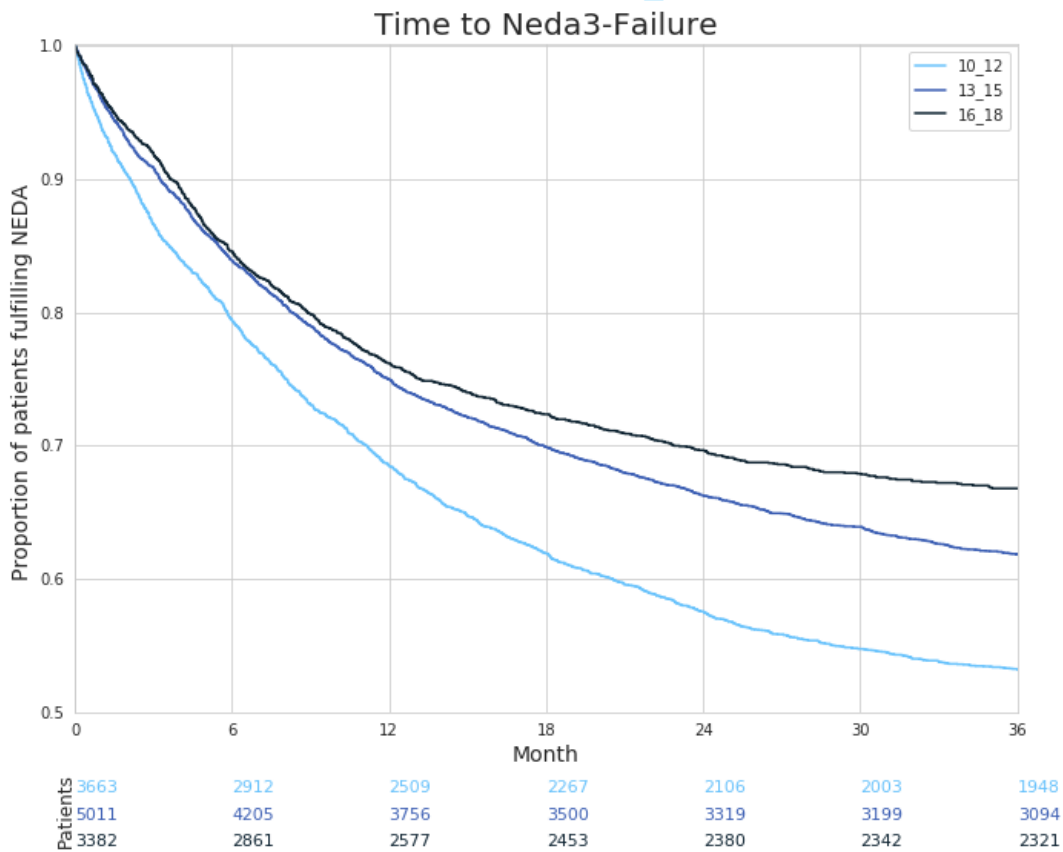



STROBE Statement—Checklist of items that should be included in reports of *cohort studies*

|                              | Item No | Recommendation                                                                                                                                                                                    |    |
|------------------------------|---------|---------------------------------------------------------------------------------------------------------------------------------------------------------------------------------------------------|----|
| <b>Title and abstract</b>    | 1       | (a) Indicate the study's design with a commonly used term in the title or the abstract                                                                                                            | ☺  |
|                              |         | (b) Provide in the abstract an informative and balanced summary of what was done and what was found                                                                                               | ☺  |
| <b>Introduction</b>          |         |                                                                                                                                                                                                   |    |
| Background/rationale         | 2       | Explain the scientific background and rationale for the investigation being reported                                                                                                              | ☺  |
| Objectives                   | 3       | State specific objectives, including any prespecified hypotheses                                                                                                                                  | ☺  |
| <b>Methods</b>               |         |                                                                                                                                                                                                   |    |
| Study design                 | 4       | Present key elements of study design early in the paper                                                                                                                                           | ☺  |
| Setting                      | 5       | Describe the setting, locations, and relevant dates, including periods of recruitment, exposure, follow-up, and data collection                                                                   | ☺  |
| Participants                 | 6       | (a) Give the eligibility criteria, and the sources and methods of selection of participants. Describe methods of follow-up                                                                        | ☺  |
|                              |         | (b) For matched studies, give matching criteria and number of exposed and unexposed                                                                                                               | NA |
| Variables                    | 7       | Clearly define all outcomes, exposures, predictors, potential confounders, and effect modifiers. Give diagnostic criteria, if applicable                                                          | ☺  |
| Data sources/<br>measurement | 8*      | For each variable of interest, give sources of data and details of methods of assessment (measurement). Describe comparability of assessment methods if there is more than one group              | ☺  |
| Bias                         | 9       | Describe any efforts to address potential sources of bias                                                                                                                                         | ☺  |
| Study size                   | 10      | Explain how the study size was arrived at                                                                                                                                                         | NA |
| Quantitative variables       | 11      | Explain how quantitative variables were handled in the analyses. If applicable, describe which groupings were chosen and why                                                                      | ☺  |
| Statistical methods          | 12      | (a) Describe all statistical methods, including those used to control for confounding                                                                                                             | ☺  |
|                              |         | (b) Describe any methods used to examine subgroups and interactions                                                                                                                               | ☺  |
|                              |         | (c) Explain how missing data were addressed                                                                                                                                                       | NA |
|                              |         | (d) If applicable, explain how loss to follow-up was addressed                                                                                                                                    | NA |
|                              |         | (e) Describe any sensitivity analyses                                                                                                                                                             | NA |
| <b>Results</b>               |         |                                                                                                                                                                                                   |    |
| Participants                 | 13*     | (a) Report numbers of individuals at each stage of study—eg numbers potentially eligible, examined for eligibility, confirmed eligible, included in the study, completing follow-up, and analysed | ☺  |
|                              |         | (b) Give reasons for non-participation at each stage                                                                                                                                              | NA |
|                              |         | (c) Consider use of a flow diagram                                                                                                                                                                | NA |
| Descriptive data             | 14*     | (a) Give characteristics of study participants (eg demographic, clinical, social) and information on exposures and potential confounders                                                          | ☺  |
|                              |         | (b) Indicate number of participants with missing data for each variable of interest                                                                                                               | ☺  |
|                              |         | (c) Summarise follow-up time (eg, average and total amount)                                                                                                                                       | ☺  |
| Outcome data                 | 15*     | Report numbers of outcome events or summary measures over time                                                                                                                                    | ☺  |
| Main results                 | 16      | (a) Give unadjusted estimates and, if applicable, confounder-adjusted estimates and their precision (eg, 95% confidence interval). Make clear which                                               | NA |

|                          |    |                                                                                                                                                                            |    |
|--------------------------|----|----------------------------------------------------------------------------------------------------------------------------------------------------------------------------|----|
|                          |    | confounders were adjusted for and why they were included                                                                                                                   |    |
|                          |    | (b) Report category boundaries when continuous variables were categorized                                                                                                  | ☺  |
|                          |    | (c) If relevant, consider translating estimates of relative risk into absolute risk for a meaningful time period                                                           | NA |
| Other analyses           | 17 | Report other analyses done—eg analyses of subgroups and interactions, and sensitivity analyses                                                                             | NA |
| <b>Discussion</b>        |    |                                                                                                                                                                            |    |
| Key results              | 18 | Summarise key results with reference to study objectives                                                                                                                   | ☺  |
| Limitations              | 19 | Discuss limitations of the study, taking into account sources of potential bias or imprecision. Discuss both direction and magnitude of any potential bias                 | ☺  |
| Interpretation           | 20 | Give a cautious overall interpretation of results considering objectives, limitations, multiplicity of analyses, results from similar studies, and other relevant evidence | ☺  |
| Generalisability         | 21 | Discuss the generalisability (external validity) of the study results                                                                                                      | NA |
| <b>Other information</b> |    |                                                                                                                                                                            |    |
| Funding                  | 22 | Give the source of funding and the role of the funders for the present study and, if applicable, for the original study on which the present article is based              | ☺  |

\*Give information separately for exposed and unexposed groups.

**Note:** An Explanation and Elaboration article discusses each checklist item and gives methodological background and published examples of transparent reporting. The STROBE checklist is best used in conjunction with this article (freely available on the Web sites of PLoS Medicine at <http://www.plosmedicine.org/>, Annals of Internal Medicine at <http://www.annals.org/>, and Epidemiology at <http://www.epidem.com/>). Information on the STROBE Initiative is available at <http://www.strobe-statement.org>.

# BMJ Open

## The impact of drug diversity on treatment effectiveness in relapsing-remitting multiple sclerosis (RRMS) in Germany between 2010 and 2018: real-world data from the German NeuroTransData Multiple sclerosis registry

|                                 |                                                                                                                                                                                                                 |
|---------------------------------|-----------------------------------------------------------------------------------------------------------------------------------------------------------------------------------------------------------------|
| Journal:                        | <i>BMJ Open</i>                                                                                                                                                                                                 |
| Manuscript ID                   | bmjopen-2020-042480.R1                                                                                                                                                                                          |
| Article Type:                   | Original research                                                                                                                                                                                               |
| Date Submitted by the Author:   | 13-May-2021                                                                                                                                                                                                     |
| Complete List of Authors:       | Braune, Stefan; NeuroTransData GmbH<br>Rossnagel, Fabian; NeuroTransData GmbH<br>Dikow, Heidi; NeuroTransData GmbH<br>Bergmann, Arnfin; NeuroTransData GmbH<br>Study Group, NeuroTransData; NeuroTransData GmbH |
| <b>Primary Subject Heading</b>: | Neurology                                                                                                                                                                                                       |
| Secondary Subject Heading:      | Health services research, Patient-centred medicine, Qualitative research                                                                                                                                        |
| Keywords:                       | THERAPEUTICS, Adult neurology < NEUROLOGY, NEUROLOGY, Multiple sclerosis < NEUROLOGY                                                                                                                            |
|                                 |                                                                                                                                                                                                                 |

SCHOLARONE™  
Manuscripts



I, the Submitting Author has the right to grant and does grant on behalf of all authors of the Work (as defined in the below author licence), an exclusive licence and/or a non-exclusive licence for contributions from authors who are: i) UK Crown employees; ii) where BMJ has agreed a CC-BY licence shall apply, and/or iii) in accordance with the terms applicable for US Federal Government officers or employees acting as part of their official duties; on a worldwide, perpetual, irrevocable, royalty-free basis to BMJ Publishing Group Ltd ("BMJ") its licensees and where the relevant Journal is co-owned by BMJ to the co-owners of the Journal, to publish the Work in this journal and any other BMJ products and to exploit all rights, as set out in our [licence](#).

The Submitting Author accepts and understands that any supply made under these terms is made by BMJ to the Submitting Author unless you are acting as an employee on behalf of your employer or a postgraduate student of an affiliated institution which is paying any applicable article publishing charge ("APC") for Open Access articles. Where the Submitting Author wishes to make the Work available on an Open Access basis (and intends to pay the relevant APC), the terms of reuse of such Open Access shall be governed by a Creative Commons licence – details of these licences and which [Creative Commons](#) licence will apply to this Work are set out in our licence referred to above.

Other than as permitted in any relevant BMJ Author's Self Archiving Policies, I confirm this Work has not been accepted for publication elsewhere, is not being considered for publication elsewhere and does not duplicate material already published. I confirm all authors consent to publication of this Work and authorise the granting of this licence.

1  
2  
3 **The impact of drug diversity on treatment effectiveness in relapsing-remitting**  
4 **multiple sclerosis (RRMS) in Germany between 2010 and 2018: real-world data**  
5 **from the German NeuroTransData Multiple sclerosis registry**  
6  
7

8 **Stefan Braune<sup>1</sup>, Fabian Rossnagel<sup>1</sup>, Heidi Dikow<sup>1</sup>, Arnfin Bergmann<sup>1</sup>, NTD Study**  
9 **group<sup>1</sup>**  
10  
11

12  
13 **Affiliations:**  
14

15  
16 1 NeuroTransData German Doctors Network. Bahnhofstr 103b, 86633 Neuburg an der  
17 Donau, Germany  
18  
19

20  
21 **Corresponding author:**  
22

23  
24 **Prof. Dr. Stefan Braune**, Neurologist, NeuroTransData, Bahnhofstr. 103b, 86633  
25 Neuburg an der Donau, Germany  
26

27 Contact address: Neurozentrum Prien, Bernauer Str. 12, 83209 Prien  
28

29 Email: [sbraune@neurotransdata.com](mailto:sbraune@neurotransdata.com)  
30

31 Phone: 0049-151 20746003  
32

33 Fax: 0049-8051-64500  
34  
35

36 **Fabian Rossnagel**, Health economist, NeuroTransData, Bahnhofstr. 103b, 86633  
37 Neuburg an der Donau, Germany. [frossnagel@neurotransdata.com](mailto:frossnagel@neurotransdata.com)  
38

39 **Heidi Dikow**, Data scientist, NeuroTransData, Bahnhofstr. 103b, 86633 Neuburg an der  
40 Donau, Germany. [hdikow@neurotransdata.com](mailto:hdikow@neurotransdata.com)  
41

42 **Dr.med. Arnfin Bergmann**, Neurologist, NeuroTransData, Bahnhofstr. 103b, 86633  
43 Neuburg an der Donau, Germany. [abergmann@neurotransdata.com](mailto:abergmann@neurotransdata.com)  
44  
45

46 **NTD Study Group**, Doctors and study nurses of the German NeuroTransData network,  
47 see [www.neurotransdata.com/praxen](http://www.neurotransdata.com/praxen)  
48  
49  
50  
51  
52  
53  
54  
55  
56  
57  
58  
59  
60

## Abstract

### Objective

To evaluate the impact of drug diversity on treatment effectiveness in relapsing-remitting multiple sclerosis (RRMS) in Germany.

### Design

This study employs real world data captured in-time during clinical visits in 67 German neurology outpatient offices of the NeuroTransData (NTD) MS registry between 1 Jan 2010 and 30 Jun 2019, including 237,976 visits of 17,553 RRMS patients. Adherence and clinical effectiveness parameters were analyzed by descriptive statistics, time-to-event analysis overall and by disease modifying therapies (DMTs) stratified by administration modes (injectable, oral and infusion). Three time periods were compared: 2010–2012, 2013–2015, and 2016–2018.

### Results

Between 2010 and 2018, an increasing proportion of RRMS patients were treated with DMTs and treatment was initiated sooner after diagnosis of MS. Introduction of oral DMT temporarily induced higher readiness to switch. Comparing the three index periods, there was a continuous decrease of annualized relapse rates, less frequent EDSS progression and increasing periods without relapse, EDSS worsening and with stability of no-evidence-of-disease-activity (NEDA) 2 and 3 criteria, lower conversion rates to secondary progressive MS (SPMS) on oral and on injectable DMTs.

### Conclusion

Sparked by the availability of new mainly oral DMTs, RRMS treatment effectiveness improved clinically meaningful between 2010 and 2018. As similar effects were seen for injectable and oral DMTs more than for infusions, a better personalized treatment allocation in many patients is likely. These results indicate that there is an overall beneficial effect for the whole MS patient population as a result of the greater selection of available DMTs, a benefit beyond the head-to-head comparative efficacy, resulting from an increased probability and readiness to individualize MS therapy.

### Strengths and limitations

The strengths of our study include its sustained high population size, constant high frequency of visits per year documented and mean duration of follow up of 5.07 years (SD 4.46), the consistency of formats and definitions of the data over the whole study period between 2010 until 2019, the high level of data completeness of the MS core data set as recommended by the European medical agency (EMA/548474/2017) and high data accuracy accomplished by multiple data quality steps from automated data entry checks to regular data consistency checks every 3 months and requests for missing

1  
2  
3 information. Analysis was performed without data imputation. Limitations are the  
4 inclusion of outpatients only and of only German MS patients. Follow-up times varied  
5 between patients. As there is no validated, generally accepted definition of SPMS, the  
6 diagnosis of SPMS is made by clinical judgement of the treating physician based on best  
7 medical knowledge. Also the time of clinical diagnosis of RRMS and SPMS are not  
8 reflecting their true pathophysiological start, which has to be accepted as best possible  
9 standard. Like all observational studies, residual confounding by unknown confounders  
10 is possible.  
11  
12  
13  
14  
15  
16

## 17 **Introduction**

18  
19 The field of multiple sclerosis (MS) treatment have seen dynamic developments over the  
20 last three decades. 1. Since the introduction of the first interferon- $\beta$ 1a (IF-b1a) in 1994,  
21 treatment options for patients with relapsing remitting MS (RRMS) have expanded to 14  
22 different disease modifying therapies (DMTs) registered in Europe. 2. Regulatory  
23 authorities have defined new MS subgroups such as high-disease activity course of  
24 RRMS, relapsing MS (RMS), RRMS and relapsing forms of secondary progressive MS, for  
25 the definition of drug labels 3. Regulatory authorities have also developed legislative and  
26 administrative initiatives such as the “AMNOG procedure” to control costs of drugs, in  
27 the face of drug costs in Germany raising from €30.2 billion to €43.9 billion from 2010–  
28 2018.[1] 4. Patients, physicians and payers expect allocation of the most effective DMT  
29 for the individual patient while minimizing adverse events. While reduction of relapse  
30 activity was the treatment goal in the 1990s, current treatment goals strive for “no  
31 evidence of disease activity”.  
32  
33  
34  
35  
36

37 However, little is known about the impact of these developments on real-world  
38 treatment pattern and effectiveness on disease activity in RRMS. This analysis  
39 investigates treatment pattern and effectiveness over time by comparing three time  
40 periods between 2010 and 2018 (defined by availability of new DMTs entering the  
41 German market) of real-world data from the physician’s network NeuroTransData  
42 (NTD) in Germany.  
43  
44  
45  
46  
47

## 48 **Methods**

### 49 **Database: the NTD multiple sclerosis registry**

50  
51 This project employed real-world clinical data captured by the NeuroTransData (NTD)  
52 multiple sclerosis registry. NTD is a Germany-wide physicians’ network founded in 2008  
53 and run by physicians in the fields of neurology and psychiatry  
54 (www.neurotransdata.com). Governance principles are defined. NTD generates revenue  
55 by its members’ participation in phase II–IV clinical trials, investigator initiated trials,  
56  
57  
58  
59  
60



1  
2  
3 and real-world data analytic projects in cooperation with pharmaceutical industry,  
4 payers and other players in the German and international health systems.  
5

6  
7 Currently, 132 specialists work in 67 NTD practices throughout Germany, serving  
8 approximately 600,000 outpatients per year. Each practice is certified according to  
9 network-specific and ISO 9001 criteria. An external certified organization audits  
10 compliance annually. The NTD MS registry includes approximately 25,000 patients with  
11 MS, representing about 15% of all MS patients in Germany. NTD captures demographic,  
12 clinical history, patient-related outcomes, and clinical variables in real time during  
13 clinical visits. Standardized clinical assessments of functional system scores and EDSS  
14 calculation are performed by certified raters (<http://www.neurostatus.net>). Data are  
15 entered into the web-based registry either manually or directly from digital sources.  
16 Data quality is monitored by the NTD data management team, checking for  
17 inconsistencies and errors using an error analysis program. Both automatic and  
18 manually executed queries are implemented to further ensure data quality, e.g. checks  
19 for inconsistencies and requests for missing information. High data completeness is  
20 achieved by definition of minimum data sets, mandatory data entry fields, positive  
21 missing data confirmation. Advanced dynamic web-based data capturing, regular  
22 training of doctors and nurses, interactive chat forum for nurses and doctors, automated  
23 and manual feedback query system, daily-automated analysis of data plausibility and  
24 correctness, and annual on-site audit of procedures and source data by an external  
25 process quality certifier organization contribute to high data consistency. The NTD data  
26 capturing platform is also used as patient management system in the daily care of  
27 patients in NTD offices, thus guaranteeing timeliness of data.  
28  
29  
30  
31  
32  
33  
34  
35

36 All data are pseudonymized and pooled. The Institute for Medical Information  
37 Processing, Biometry and Epidemiology (Institut für medizinische  
38 Informationsverarbeitung, Biometrie und Epidemiologie (IBE)) at the Ludwig  
39 Maximilian University in Munich, Germany, manages codes and acts as an external trust  
40 center. Pooled data are stored on NTD servers and other NTD-controlled storage  
41 technology. This data acquisition and management protocol was approved by the ethical  
42 committee of the Bavarian Medical Board (Bayerische Landesärztekammer, June 14,  
43 2012) and re-approved by the ethical committee of the Medical Board North-Rhine  
44 (Ärztekammer Nordrhein, April 25, 2017). Compliance with European and German  
45 legislation (BDSG, EU-DSGVO) is warranted including patient rights and informed  
46 consent requirements. Patient participation, informed consent procedures, data  
47 capturing, management and analytics fulfill the “Guidelines for Good  
48 Pharmacoepidemiology Practices (GPP) of the International Society for  
49 Pharmacoepidemiology”[2], the Strengthening the Reporting of Observational Studies in  
50 Epidemiology (STROBE) guidelines[3], the European Medicines Agency requirements  
51 for the “Use of patient disease registries for regulatory purposes – methodological and  
52 operational considerations”[4] and the ethical principles laid down in the Declaration of  
53 Helsinki[5].  
54  
55  
56  
57  
58  
59  
60

Data for this project were captured between 1 January 2010 and 30 June 2019.



## Data quality of the NeuroTransData Multiple Sclerosis registry

The main components for data quality of medical real-world data registries proposed by European Medicine Agency[4] are fulfilled by the NTD MS registry. The NTD also realizes the quality criteria of the EunetHTA REQueST (Registry Evaluation and Quality Standards Tool)[6] with 14 of 14 points in section “Methodological Information”, 23 of 24 points in section “Essential Standards” and 5 of 6 points in section “Additional Requirements”.

## Patient population

All patients with diagnosis of relapsing-remitting or secondary progressive multiple sclerosis documented in the NTD MS registry between 01.01.2010 and 30.12.2018 with at least one clinical visit were included. In patients with RRMS the McDonald criteria as defined at the time of diagnosis of MS had to be fulfilled and documented in the registry. 17,553 patients with RRMS were included.

From this population 12,181 RRMS patients were identified in whom a DMT was initiated between 2010 and 2018. This group was stratified in three populations according to their time of initiation of DMT (see next section).

As there is no accepted and validated diagnostic procedure to confirm SPMS, the generally applied diagnostic criteria for SPMS were applied by the treating neurologists to establish this diagnosis. Time of switch from RRMS to SPMS is defined as the first clinical visit, when in the treating neurologists’ judgement the criteria for manifest SPMS were fulfilled.

## Data analysis

Analysis was performed in 3 time periods, reflecting different spectra of DMTs available during the respective period.

2010–2012 (index period 10–12): era of early treatment initiation at the stage of clinically isolated syndrome (CIS) with interferons and glatiramer acetate and escalation with natalizumab approved since 2006 and fingolimod approved since 2011 for high-disease-activity (HDA) patients. HDA is defined by the European Medicines Agency drug label as active disease despite treatment with at least one disease modifying therapy or disease activity with 2 or more disabling relapses in one year without therapy, and with 1 or more Gadolinium enhancing lesions on brain MRI or a significant increase in T2 lesion load as compared to a previous recent MRI.

2013–2015 (index period 13–15): era of therapy diversification with introduction of alemtuzumab as an infusion for HDA patients, teriflunomide and dimethyl fumarate as oral drugs for all stages of RRMS.

1  
2  
3 2016–2018 (index period 16–18): era of consolidated DMT spectrum. Cladribine, an oral  
4 HDA activity drug, was newly approved in August 2017. Daclizumab, which became  
5 available in July 2016, was restricted in July 2017 and withdrawn in March 2018, was  
6 not considered as numbers of patients were very small and a temporary distortion of  
7 results in the injectable group had to be excluded.  
8  
9

10 Parameters characterizing treatment acceptance and adherence were analysed for each  
11 index period.  
12  
13

14 Impact on treatment effectiveness was analyzed between 2010 and 2018 and for each  
15 index period for the strata “all DMT”, “injectables” including interferons- $\beta$ -1a,  
16 interferons- $\beta$ -1b, glatiramer acetate, “orals” including fingolimod, teriflunomide,  
17 dimethyl fumarate, cladribine, “infusions” including natalizumab, alemtuzumab, based  
18 on the European labels of these DMTs.  
19  
20

21 Treatment effectiveness was analysed for RRMS patients on DMT by annualized relapse  
22 rate (ARR), time-to-first-relapse on DMT, percentage of patients with 6 months  
23 confirmed disability-progression (6mCDP, CDP defined as at least 1.0-point EDSS score  
24 increases for patients with baseline EDSS score 0–5.5 EDSS and at least 0.5-point EDSS  
25 score increases for patients with baseline EDSS score greater than 5.5), time-to-6mCDP  
26 on DMT, time-from-first symptom to EDSS  $\geq$ 3-5 and  $>$ 5 (in month), time-to-no-  
27 evidence-of-disease-activity (NEDA) 2 and 3 failure on DMT being started in the index  
28 periods. NEDA 2 is defined as no clinical evidence of relapse activity or disability  
29 progression. For NEDA 3 status no evidence of MRI activity, either new lesions or  
30 Gadolinium enhancing lesions, is required in addition to NEDA 2 criteria. Risk rates for  
31 discontinuation were calculated as ratio of number of patients with discontinuation of  
32 DMT divided by all patients.  
33  
34  
35  
36  
37  
38  
39  
40

### 41 **Patient and Public Involvement**

42  
43 There was no patient involvement.  
44  
45  
46  
47  
48  
49

### 50 **Role of funding source**

51  
52 This study was conducted by NTD without additional funding or guidance by external  
53 sponsors.  
54  
55  
56  
57  
58  
59  
60

## Results

### Data Quality

Exemplary frequencies of data captured constantly over time for several data items (see Table 1) underline the high data quality and consistency over time. The mean duration of follow-up was 5.07 years (SD 4.46). A total of 59,928 DMT treatment cycles were documented between 2010 and 2018.

**Table 1.** Numbers of patients with RRMS, visits per year and therapy cycles with DMTs captured in the NTD MS registry between 2010 and 2018. DMT, disease-modifying treatment; MRI, magnetic resonance imaging; RRMS, relapsing remitting multiple sclerosis.

| Index year        | Number RRMS patients | Visits documented per year | DMT cycles per year | Relapses per year | MRI per year |
|-------------------|----------------------|----------------------------|---------------------|-------------------|--------------|
| 2010              | 5,170                | 16,377                     | 4,168               | 1,821             | 3,096        |
| 2011              | 6,648                | 24,296                     | 5,441               | 2,638             | 4,004        |
| 2012              | 7,017                | 23,298                     | 5,893               | 2,600             | 3,107        |
| 2013              | 7,532                | 25,840                     | 6,410               | 2,433             | 3,866        |
| 2014              | 7,591                | 28,261                     | 7,536               | 2,076             | 3,989        |
| 2015              | 8,074                | 28,313                     | 7,443               | 1,972             | 3,879        |
| 2016              | 8,401                | 29,715                     | 7,566               | 1,795             | 3,781        |
| 2017              | 9,021                | 31,199                     | 7,862               | 1,707             | 3,575        |
| 2018              | 8,946                | 30,677                     | 7,609               | 1,487             | 4,102        |
| 2010–2018         |                      | 237,976                    | 59,928              | 18,529            | 33,399       |
| Mean/patient/year |                      | 3.48                       | 0.88                | 0.27              | 0.49         |

### Patient Population

A total of 17,553 patients with RRMS were identified between 2010 and 2018 (73.6% female, 26.4% male). Mean age at diagnosis of RRMS was 34 years (SD 10.66), mean annualized relapse rate between 2010 and 2018 was 0.27 (SD 0.6). From this group, in 12.181 patients a DMT was initiated in this period. Table 2 shows consistency and

completeness of data of this patient group stratified into the three time periods between 2010 and 2018.

**Table 2.** Means and percentages of RRMS patient characteristics of the NTD MS registry in time periods between 2010 and 2018 at initiation of DMT (=index event). DMT, disease-modifying therapy MRI, magnetic resonance imaging; RRMS, relapsing remitting multiple sclerosis; SD, standard deviation.

| Characteristic                             | 10-12<br>(N=3,942) | 13-15<br>(N=5,101) | 16-18<br>(N=3,138) | All patients<br>(N=12,181) |
|--------------------------------------------|--------------------|--------------------|--------------------|----------------------------|
| Female, %                                  | 73.17              | 73.74              | 71.86              | 73.07                      |
| Age, years (SD)                            | 44.95 (10.21)      | 43.93 (10.88)      | 40.7 (11.03)       | 43.59 (10.94)              |
| EDSS (SD)                                  | 2.12 (1.59)        | 2.10 (1.62)        | 1.89 (1.53)        | 2.05 (1.59)                |
| Relapses (SD) before index event           | 1.93 (2.55)        | 2.26 (2.63)        | 2.21 (2.67)        | 2.14 (2.62)                |
| Months MS duration (SD)                    | 87.78 (85.87)      | 101.78 (93.62)     | 98.73 (94.99)      | 96.46 (91.75)              |
| DMTs before index event (SD)               | 0.8 (1.01)         | 1.08 (1.14)        | 1.2 (1.26)         | 1.02 (1.14)                |
| MRI around index event, %                  | 39.93              | 43.5               | 37.38              | 40.77                      |
| MRI with progression around index event, % | 20.83              | 20.78              | 18.36              | 20.17                      |

### Treatment acceptance

Overall proportions of RRMS patients actively treated with DMT increased steadily: 10-12, 70.7%; 13-15, 78.1%; 16-18, 80.1%. Proportions of DMT types by application changed during the 3 time periods 10-12/13-15/16-18 with percentages of patients on injectables 88/69/46, orals 13/44/54, infusions 12/10/10. Total percentages per period exceed 100% as some patients received more than one DMT per period (see section "Persistence on DMT"). Proportions of RRMS patients receiving so-called high-disease activity DMTs increased continuously: 10-12, 23%; 13-15, 27%; 16-18, 31%.

### Initiation of DMT after diagnosis of RRMS

More patients started on a DMT within 6 months after diagnosis of RRMS (10-12, 62%; 13-15, 72%; 16-17, 66%), with shorter periods between first symptom and initiation of first DMT (10-12, 178  $\pm$  295 days; 13-15, 121  $\pm$  174 days; 16-18, 115  $\pm$  112 days). Orals were increasingly preferred as first DMT as they became available during the 3 periods of time 10-12/13-15/16-18 with percentages of patients on injectables 74/44/40, orals 19/52/55, infusions 7/4/5.

## Persistence on DMT

Availability of oral DMT increased the proportion of switches between DMTs from 16% of patients on treatment in 10–12 to 24% in 13–15, while in 16–18, 14% of patients on DMT switched. In parallel, time to discontinuation remained stable within these 3-years periods: in 10–12 mean time to discontinuation 8.49 months (SD 7.14); in 13–15, 8.10 months (SD 6.92); and in 16–18, 8.49 months (SD 7.71). There was a trend for patients staying longer on overall treatment for the most recent time period. This trend was driven by longer persistence of patients on infusion therapies in the most recent time period (Figure 1).

**Figure 1.** Time to discontinuation of DMTs in RRMS patients for time periods 2010–2012, 2013–2015, 2016–2018, all DMT (A) and by injectables (B), orals (C), infusions (D). DMT, disease-modifying treatments; RRMS, relapsing remitting multiple sclerosis

A. all DMT

B Injectables

C Orals

D Infusions

Non-medical reasons for discontinuation, such as patients' perceptions and wishes, decreased over time from 71 to 51%. Lack of effectiveness is increased as a motivation for switching DMTs, as well as adverse events or pregnancy/family planning (Table 3).

**Table 3. Reasons overall and risk rates by application type of DMT for discontinuation for three time periods 2010–2012, 2013–2015, and 2016–2018.**

Non-medical reasons summarize patients' perceptions and wishes. DMT, disease-modifying treatment; NA, not applicable as criteria was not captured.

| <b>Reasons for discontinuation, %</b> | <b>10–12</b> | <b>13–15</b> | <b>16–18</b> |
|---------------------------------------|--------------|--------------|--------------|
| Antibodies/JCV-virus titer            | 1.28         | 1.85         | 1.51         |
| family planning                       | 4.10         | 5.48         | 6.34         |
| Adverse events                        | 5.13         | 15.89        | 13.12        |
| Lack of effectiveness                 | 18.21        | 19.31        | 27.90        |
| Freedom of disease activity           | NA           | 0.34         | 0.36         |
| Non-medical reasons                   | 71.28        | 57.11        | 50.76        |
| <b>Risk rates for discontinuation</b> |              |              |              |
| Injectables                           | 0.59         | 0.54         | 0.33         |
| Orals                                 | 0.39         | 0.36         | 0.21         |
| Infusions                             | 0.59         | 0.37         | 0.17         |

Risk rates for discontinuation decreased continuously for all types of DMT over the three time periods, reaching a decrease of 44% for injectables, 46% for orals and 71% for infusions between 2010–2012 and 2016–2018.

### DMT switching pattern

Patients increasingly switched from injectables to oral infusion DMTs, while switches to injectables decreased. Follow-on DMTs after oral DMTs were predominantly oral DMT. If infusion therapy was discontinued, almost all patients continued with oral DMTs (see Figure 2).

**Figure 2.** Percentage of switches between injectable, oral and infusion DMTs in RRMS for time periods A) 2010–2012, B) 2013–2015, C) 2016–2018. DMT, disease-modifying therapy; RRMS, relapsing remitting multiple sclerosis.

A

B

C

## Treatment effectiveness

### Relapse activity

Annualized relapse rate (ARR) decreased by a mean 39% overall, 40% for injectables and 30% for orals. Infusion therapies did not decrease (Figure 3).

**Figure 3:** Annualized relapse rate in three time periods 2010–2012, 2013–2015, 2016–2018 on DMT overall and by application type. DMT, disease-modifying therapy.

Proportions of patients documented with 6mCDP, with progression of EDSS <3 to ≥3–5 as well as from EDSS <5 to ≥5 decreased by 39% and 23%, respectively, between the first and the last time period analyzed. In parallel, times from first symptom of RRMS to reach the defined EDSS ranges increased by 22% and 15% respectively (see Table 4).

**Table 4.** Six months confirmed disability progression (6m CDP. EDSS increase of ≥1.0 for patients from previous EDSS): proportion of patients reaching EDSS ≥3 to 5, reaching EDSS ≥5 and months from first symptom of RRMS to 6mCDP in these strata.

|                                          | EDSS <3 to | EDSS <5 to | Months to 6mCDP |       | Months to 6mCDP |        |
|------------------------------------------|------------|------------|-----------------|-------|-----------------|--------|
|                                          | ≥3–<5      | ≥5         | EDSS ≥3-5       |       | EDSS ≥5         |        |
|                                          | % patients | % patients | Mean            | SD    | Mean            | SD     |
| <b>10–12</b>                             | 1.02       | 0.26       | 122.30          | 81.03 | 181.59          | 92.17  |
| <b>13–15</b>                             | 0.76       | 0.31       | 130.95          | 85.60 | 181.37          | 110.04 |
| <b>16–18</b>                             | 0.62       | 0.20       | 149.26          | 93.32 | 209.73          | 97.70  |
| <b>Difference from 10–12 to 16–18, %</b> | -39        | -23        | +22             |       | +15             |        |

### Maintenance of NEDA 2 and 3 criteria

There was a clear trend that patients who initiated DMTs for a minimum of 3 months in these index periods remained more frequently and longer free of disease activity according to NEDA 2 (no relapse, no 6mCDP) and NEDA 3 (no relapse, no 6mCDP, no MRI progression) criteria over the three periods of time (Figure 4).

1  
2  
3 **Figure 4.** A. Time to failure of no-evidence-of disease-activity (NEDA) 2 (no relapse, no  
4 confirmed disability progression) and B. NEDA 3 (no relapse, no 6months confirmed  
5 disability progression, no MRI worsening) criteria in RRMS patients on DMTs after a  
6 minimum treatment period of 3 months with treatment initiation within three time  
7 periods 2010–2012, 2013–2015, 2016–2018. DMT, disease-modifying treatment; MRI,  
8 magnetic resonance imaging; RRMS, relapsing remitting multiple sclerosis.  
9  
10  
11  
12  
13

14 A.

15  
16  
17  
18 B.  
19  
20  
21  
22  
23  
24

25 Mean times to NEDA 2 and 3 failure, censored for the 3 time periods, increased  
26 continuously. NEDA 2: 10–12, 6.92 months (SD 6.66); 13–15, 7.10 months (SD 6.55);  
27 16–18, 7.43 months (SD 7.11). NEDA 3: 10–12, 6.70 months (SD 6.41); 13–15, 7.16  
28 months (SD 6.42); 16–18, 7.49 months (SD 6.89).  
29  
30  
31  
32

### 33 Progression to SPMS

34  
35 Between 2010 and 2018, overall 2.34% of 17,553 patients switched from RRMS to SPMS  
36 during a mean follow-up time of 5.31 years. The mean time from first symptom of MS to  
37 SPMS was 214 months (SD 113.77), almost 18 years. Time-to-SPMS progression analysis  
38 did not reveal time differences between the 3 index time periods (not shown here).  
39 There was a continuous trend towards lower numbers of patients switching to SPMS  
40 while on DMT for at least 12 months from 4.25% in 10–12, to 1.97% in 13–15, and to  
41 1.46% in 16–18.  
42  
43  
44  
45  
46  
47  
48  
49  
50  
51  
52  
53  
54  
55  
56  
57  
58  
59  
60



## Discussion

Medical guidelines, regulatory processes and public discussion in Germany and other countries regarding clinical benefits, treatment strategies and drug pricing are often focused on results from the randomized controlled trial (RCT) with an active comparator and versus placebo that led to registration of the drug[7]. However, clinical usage in a broad natural spectrum of patients and the increasing complexity of treatment options are causing a knowledge gap that RCTs are unable to fill. Thus, qualified real-world-data (RWD) are increasingly employed to evaluate optimization of therapeutic strategies[8-11]. Translating DMT efficacy studies into evidence-based clinical practice by meta-analysis of 123 unique RRMS studies was extremely limited. One main limitations was the paucity of efficacy data beyond 3 years of treatment[12]. Other initiatives addressed methodological aspects of this efficacy–effectiveness gap between results of RCTs in selected patient groups and effectiveness in real-world usage[13]. This is the first study to address population effects of a series of newly introduced DMTs in RRMS on adherence and clinical effectiveness.

Transparent data quality is the key stone of any scientific project. The physician-owned NTD MS registry can demonstrate constant data density, including a mean of 3.5 patient visits documented over the last 9 years, based on a defined minimal dataset and high data quality. This was achieved by utilization of web-based in-time data capturing and continuous development of automated and manual quality assurance measures for capturing data from 8,000 to 9,000 RRMS outpatients per year in Germany.

Definition criteria of the three time periods chosen for this study are thought to reflect periods characterized by different sets of DMTs being available for the treatment of RRMS patients. Between 2010 and 2018 the broader spectrum, in particular of oral DMTs motivated more patients to initiate DMT treatment and start earlier after diagnosis of RRMS. Availability of oral DMTs temporarily increased switches between DMTs in the years after their introduction from 16% in 2010–2012 to 24% of patients on DMT in 2013–2015, with a decline back to 14% of patients switching between 2016 and 2018. This is also reflected in the time-to-discontinuation analysis, showing more frequent and quicker discontinuation of injectables in 2013–2015. Lack of effectiveness and adverse events may have gained in importance over time as reasons for discontinuation of DMT, mirroring increasing expectations of doctors and patients regarding benefit/risk of DMTs. Persistence on classes of DMTs after 3 years improved most noticeable for infusions in 2010–2012 moving from 50% to almost 80% in 2015–2018, injectables increasing from less than 10% to 60% and orals achieving stable persistence of about 72%. Risk rates for discontinuation decreased overall and for each application type.

Earlier initiation of treatment and more readiness to search for individual optimal therapy by switching between a greater diversity of drugs may have impacted treatment effectiveness. ARR decreased overall and for patients on injectables and orals approximately 30–40% between 2010–2012 and 2016–2018. However, there was no

1  
2  
3 change in ARR over time for infusions. Furthermore, worsening of disability could be  
4 controlled better in parallel. The proportion of patients with EDSS reaching total sum  
5 scores >3 and > 5 decreased by 39% and 23%, respectively, and times from diagnosis to  
6 the 6mCDPs increased by 22 and 15%, respectively, when comparing time periods  
7 2010–2012 and 2016–2018.  
8  
9

10 Comparing treatment cycles initiated in these 3 time periods, these positive  
11 developments are also reflected by continuously increasing proportions of patients  
12 maintaining NEDA 2 and NEDA 3 criteria. In addition, proportions of patients on DMT  
13 switching from RRMS to SPMS decreased each time period, but mean times to SPMS  
14 from diagnosis of RRMS remained unchanged at 17.8 years, corresponding with  
15 previous published data with a conversion time to SPMS on active treatment of 16.8  
16 years [14]. The potential risk reduction for SPMS conversion on a broad spectrum of  
17 DMTs will have to be reevaluated in more detail as longer observation times on the new  
18 therapies become available.  
19  
20  
21  
22

23 The parallel improvements of reduction in ARR and disability progression, longer  
24 maintenance of NEDA 2 and 3 status in all types of DMTs, independent of their  
25 application modes, indicate that the broader selection of DMTs enable a better  
26 individual disease control in RRMS. It can be reasonably assumed that the regulatory  
27 introduced definition of high-disease-activity-labels further supported a more stringent  
28 application of the therapeutic options available. As expected, better treatment is  
29 associated with longer persistence. The observation that more efficient therapies  
30 achieved lower relapse activity in parallel with slower disability progression and longer  
31 persistence on DMTs is in line with a previous MSBase registry-based report in smaller  
32 groups of RRMS patients with advanced EDSS scores between 3 and 6[15], as well as  
33 more recent data in earlier disease stages[16]. Beside the individual patient's fate, this is  
34 of great socioeconomic relevance, as costs and utility in MS are highly correlated with  
35 disease severity[17] and progression inducing disease activity[18]. In contrast,  
36 continuing interferon- $\beta$  and glatiramer acetate therapy 10 years or longer without  
37 optimization of therapy in response to disease activity results in an inevitable, almost  
38 linear increase in mean EDSS[19].  
39  
40  
41  
42  
43  
44  
45

46 This study demonstrates a clinically meaningful, population-based benefit resulting  
47 from the availability of a broader selection of DMTs over time. The introduction of oral  
48 DMTs sparked a dynamic development between 2013 and 2015 with temporarily higher  
49 proportions of DMT switches but also more readiness to initiate DMTs earlier after  
50 diagnosis of MS. The similar extent of improvement of effectiveness parameter for oral  
51 and injectable DMTs demonstrates that this population effect is based on a more  
52 effective personalized allocation in individual patients.  
53  
54  
55

56 Overall, these results indicate that there is an overall beneficial effect for the whole MS  
57 patient population as a result of the greater selection of available DMTs, a benefit  
58 beyond the head-to-head comparative efficacy, resulting from an increased probability  
59 and readiness to individualize MS therapy. Nevertheless, the challenge in daily practice  
60

1  
2  
3 is the quick identification of the individually most effective DMT at a given time during  
4 the course of MS, particularly in patients with persistent disease activity on their current  
5 DMT, especially regarding the immanent risk of developing SPMS. Promising techniques  
6 emerge based on biomarker like neurofilament light chain[20] or B-cell activity  
7 response[21] or real-world-data-based statistical predictive algorithms[22]. As  
8 treatment decisions are driven currently by European label definitions, national cost  
9 control regulations and perceptions of physicians and patients, personalized-data-based  
10 decision support is required to further improve individual care.  
11  
12  
13  
14  
15  
16

### 17 **Contributorship statement**

18  
19 SB planned the study, analysis and wrote the manuscript. FR assisted the data analysis,  
20 interpretation of results and drafting of the manuscript. HD performed the statistical  
21 analysis and aided data interpretation. AB aided in interpreting the results and worked  
22 on the manuscript. NTD study group collected the data, performed data cleansing and  
23 data extraction from the NTD MS registry. All authors discussed the results and  
24 commented on the manuscript.  
25  
26  
27  
28  
29

### 30 **Competing interests**

31  
32 All authors declare that they have no competing interests.  
33  
34  
35

### 36 **Funding**

37  
38 This project was founded by the NeuroTransdata network itself without external  
39 resources.  
40  
41  
42  
43

### 44 **Data sharing statement**

45  
46 This project used deidentified patient data, owned by the participating doctors and  
47 provided for use in the NeuroTransData MS registry. Data can be made available upon  
48 reasonable request.  
49  
50  
51  
52  
53  
54  
55  
56  
57  
58  
59  
60

## References

1. Statista 2020. <https://de.statista.com/statistik/daten/studie/158096/umfrage/pharmagesamtmarkt-umsatzentwicklung-seit-2006/>
2. Public Policy Committee, International Society of Pharmacoepidemiology. Guidelines for good pharmacoepidemiology practice (GPP). *Pharmacoepidemiology and drug safety* 2016;25:2–10.
3. von Elm E, Altman DG, Egger M, *et al.* The Strengthening the Reporting of Observational Studies in Epidemiology (STROBE) statement: guidelines for reporting observational studies. *Lancet.* 2007;370(9596):1453-7.
4. The Cross-Committee Task Force on Patient Registries. Discussion paper: Use of patient disease registries for regulatory purposes – methodological and operational considerations. *EMA/763513/2018*.  
[https://www.ema.europa.eu/documents/other/discussion-paper-use-patient-disease-registries-regulatory-purposes-methodological-operational\\_en.docx](https://www.ema.europa.eu/documents/other/discussion-paper-use-patient-disease-registries-regulatory-purposes-methodological-operational_en.docx).
5. World Medical Association. WMA Declaration of Helsinki – Ethical Principles for Medical Research Involving Human Subjects. <https://www.wma.net/policies-post/wma-declaration-of-helsinki-ethical-principles-for-medical-research-involving-human-subjects/>
6. European Network for Health Technology Assessment. REQueST® tool and its Vision paper. Public Consultation. <https://eunethta.eu/request-tool-and-its-vision-paper-are-now-available-for-public-consultation/>
7. Wieseler B, McGauran N, Kaiser T. New drugs: where did we go wrong and what can we do better? *BMJ* 2019;366:l4340.
8. Paolicelli D, Lucisano G, Manni A, *et al.* Retrospectively acquired cohort study to evaluate the long-term impact of two different treatment strategies on disability outcomes in patients with relapsing multiple sclerosis (RE.LO.DI.MS): data from the Italian MS Register. *J Neurol.* 2019;266(12):3098-3107.
9. Boremalm M, Juto A, Axelsson M, *et al.* Natalizumab, rituximab and fingolimod as escalation therapy in multiple sclerosis. *Eur J Neurol.* 2019;26(8):1060-1067.
10. Braune S, Grimm S, van Hövell P, *et al.* Comparative effectiveness of delayed-release dimethyl fumarate versus interferon, glatiramer acetate, teriflunomide, or fingolimod: results from the German NeuroTransData registry. *J Neurol.* 2018;265(12):2980-2992.
11. Kalincik T, V. Jokubaitis, T. Spelman, *et al.* Cladribine versus fingolimod, natalizumab and interferon  $\beta$  for multiple sclerosis. *Mult. Scler* 2018;24(12):1617-1626.
12. Clafin SB, Broadley S, Taylor BV. The effect of disease modifying therapies on disability progression in multiple sclerosis: a systematic overview of meta-analyses. *Front. Neurol* 2019;9: article 1150.
13. Egger M, Moons KGM, Fletcher C. GetReal: from efficacy in clinical trials to relative effectiveness in the real world. *Research Synthesis Methods* 2016;7(3):278-281
14. Cree BAC, Gourrad PA, Oksenberg JR *et al.* Long-term evolution of multiple sclerosis disability in the treatment era. *Ann Neurol* 2016; 80:499-510
15. Lizak N, Lugaresi A, Alroughani R, *et al.* Highly active immunomodulatory therapy ameliorates accumulation of disability in moderately advanced and advanced multiple sclerosis. *J Neurol Neurosurg Psychiatry* 2017;88:196–203.
16. Lublin FD, Baier M, Cutter G. Effect of relapses on development of residual deficit in multiple sclerosis. *Neurology* 2003;61:1528–32.

17. Kobelt G, Thompson A, Berg J, *et al.* M. New insights into the burden and costs of multiple sclerosis in Europe. *Multiple Sclerosis Journal* 2017;23(8):1123–1136
18. Ness NH, Schriefer D, Haase R, *et al.* Differentiating societal costs of disability worsening in multiple sclerosis. *J Neurol* 2019; 267(4):1035-1042.
19. Palace J, Duddy M, Lawton M, *et al.* Assessing the long-term effectiveness of interferonbeta and glatiramer acetate in multiple sclerosis: final 10-year results from the UK multiple sclerosis risksharing scheme. *J Neurol Neurosurg Psychiatry* 2019;90:251–260.
20. Kuhle J, Kropshofer H, Haering DA, *et al.* Blood neurofilament light chain as a biomarker of MS disease activity and treatment response. *Neurology* 2019;92:e1007-e1015.
21. Tacke S, Braune S, Rovituso DM, *et al.* In vivo B-cell activity predicts response to treatment with glatiramer acetate and interferons in patients with relapsing-remitting multiple sclerosis (RRMS). *Neurology: Neuroimmunology & Neuroinflammation* 2021; 8/3: in print
22. Stuehler E, Braune S, Lionetto F, *et al.* Framework for personalized prediction of treatment response in relapsing remitting multiple sclerosis. *BMC Medical Research Methodology* 2020;20(1):24.

A.

Time to Discontinuation - All Application Types

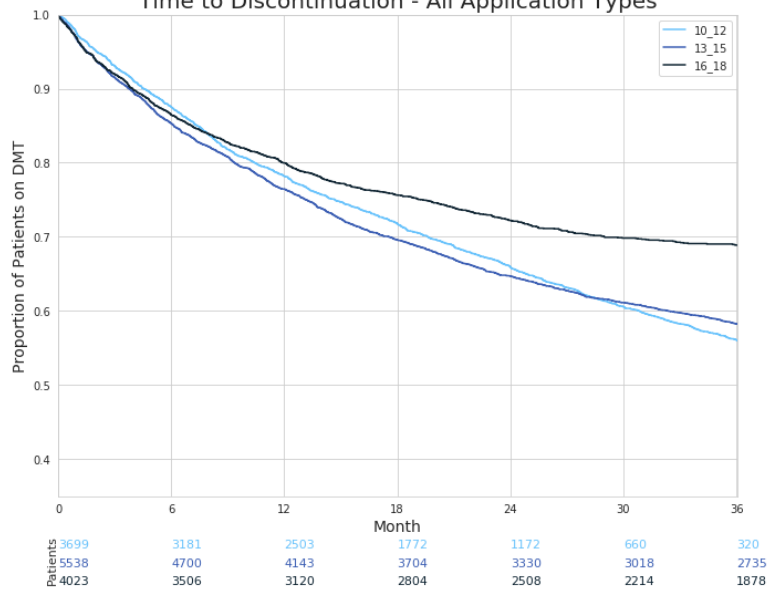

B.

Time to Discontinuation - Injectables

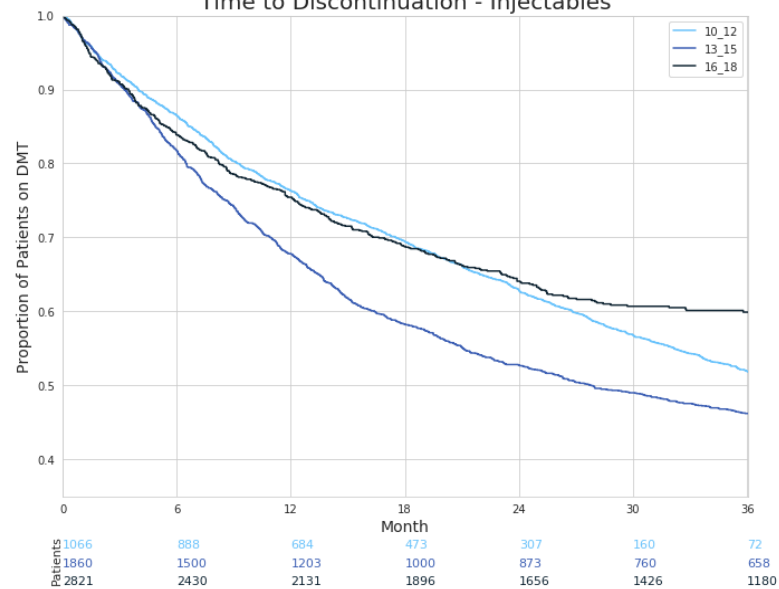

B.

Time to Discontinuation - Orals

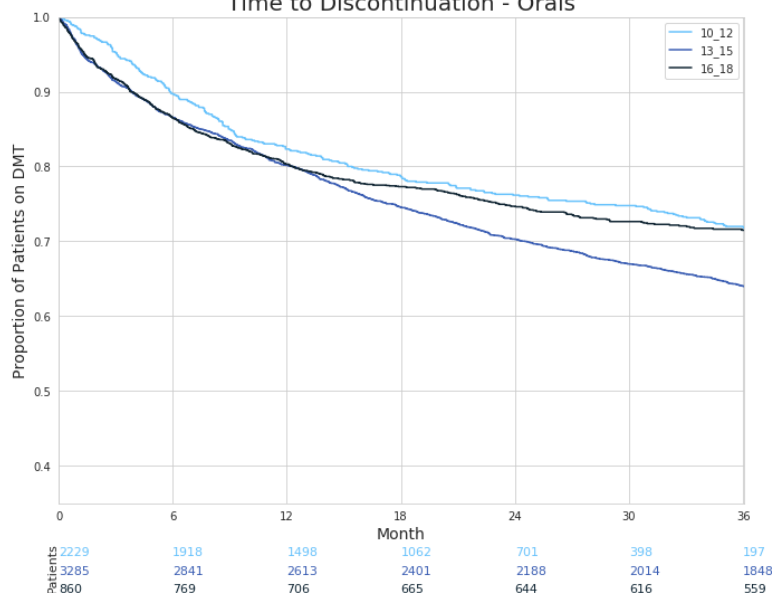

D.

Time to Discontinuation - Infusion

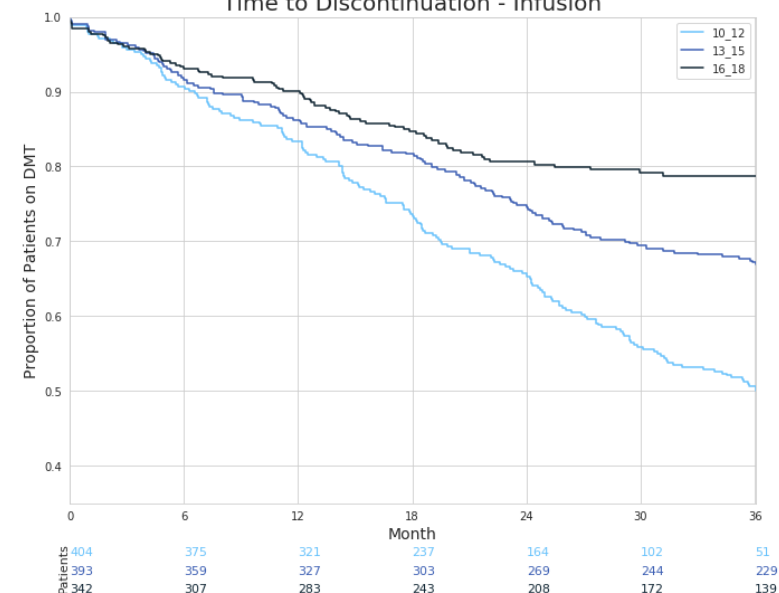

A.

Switchers in Index Period: 10\_12

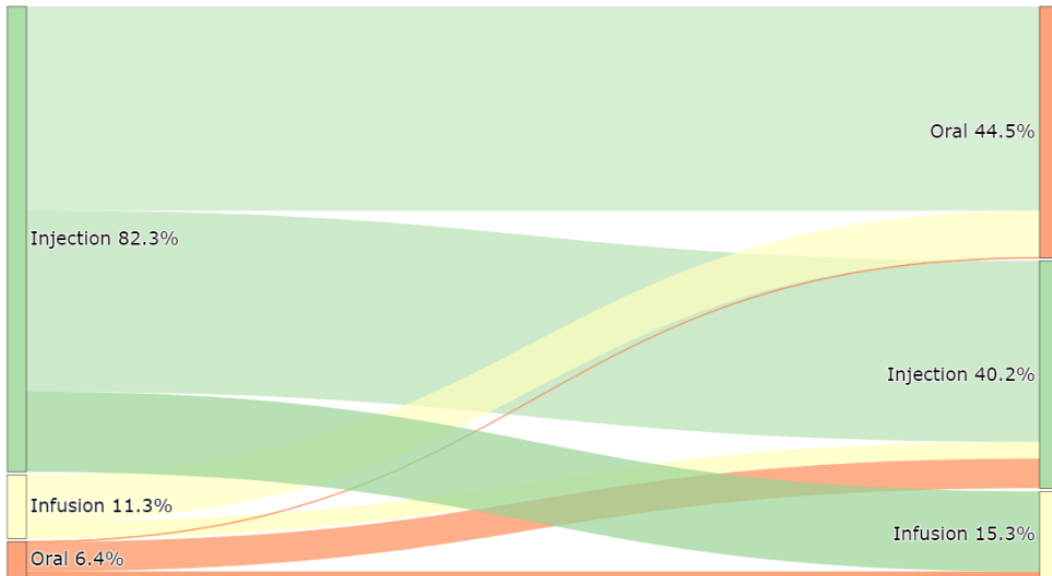

B.

Switchers in Index Period: 13\_15

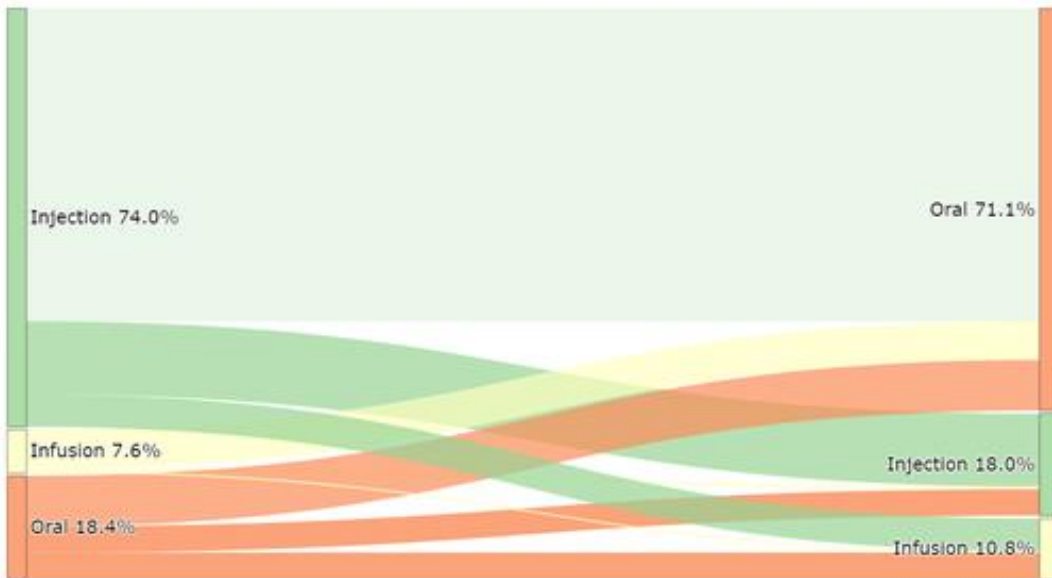



1  
2  
3  
4  
5  
6  
7  
8  
9  
10  
11  
12  
13  
14  
15  
16  
17  
18  
19  
20  
21  
22  
23  
24  
25  
26  
27  
28  
29  
30  
31  
32  
33  
34  
35  
36  
37  
38  
39  
40  
41  
42  
43  
44  
45  
46  
47  
48  
49  
50  
51  
52  
53  
54  
55  
56  
57  
58  
59  
60

C.

Switchers in Index Period: 16\_18

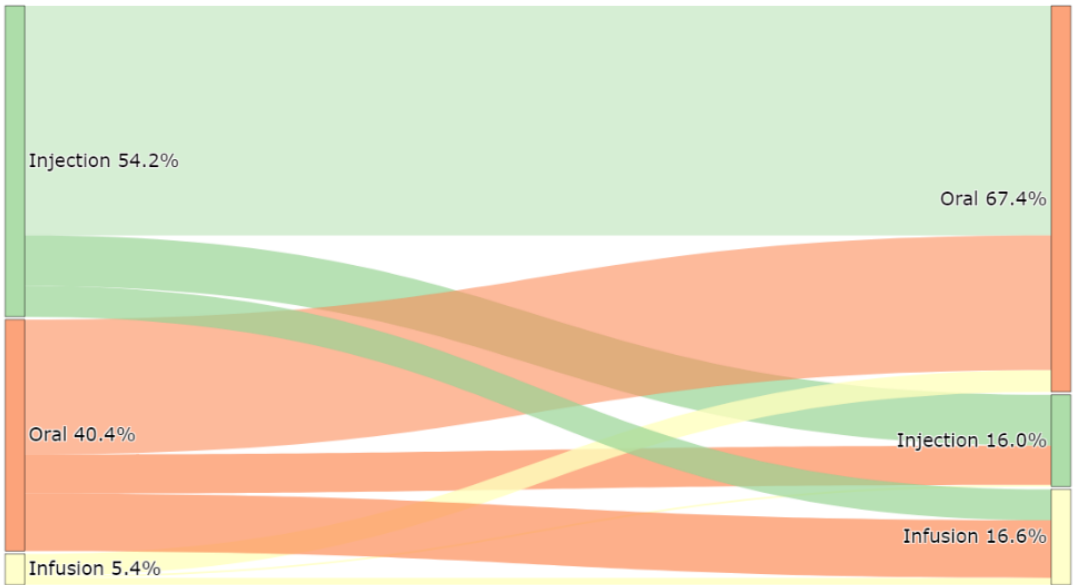

review only



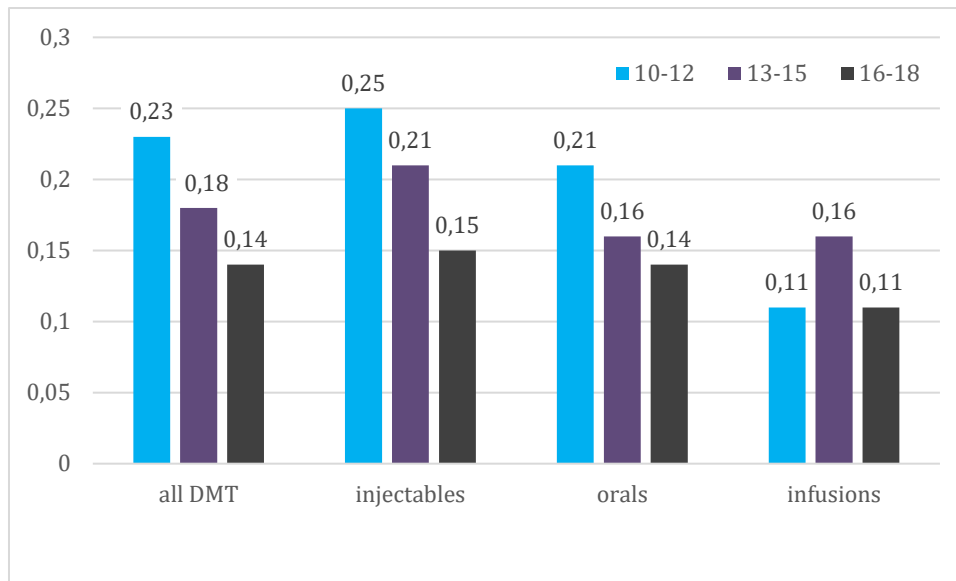

A.

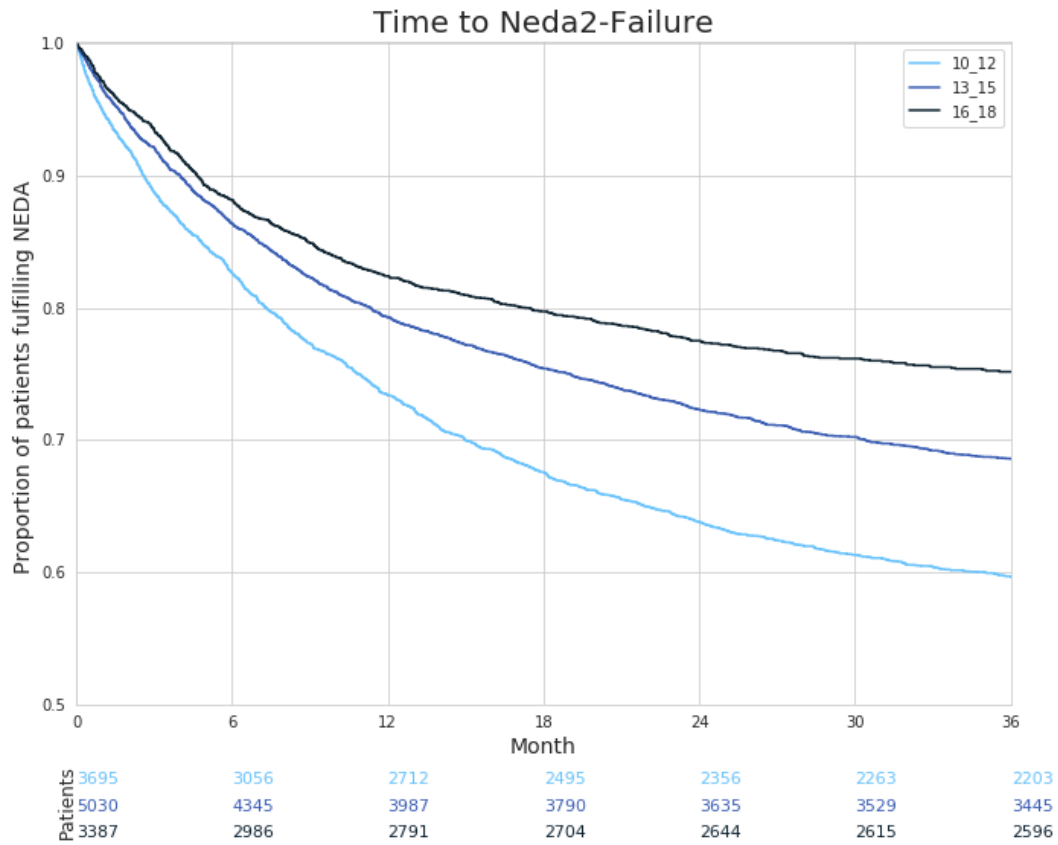

B.

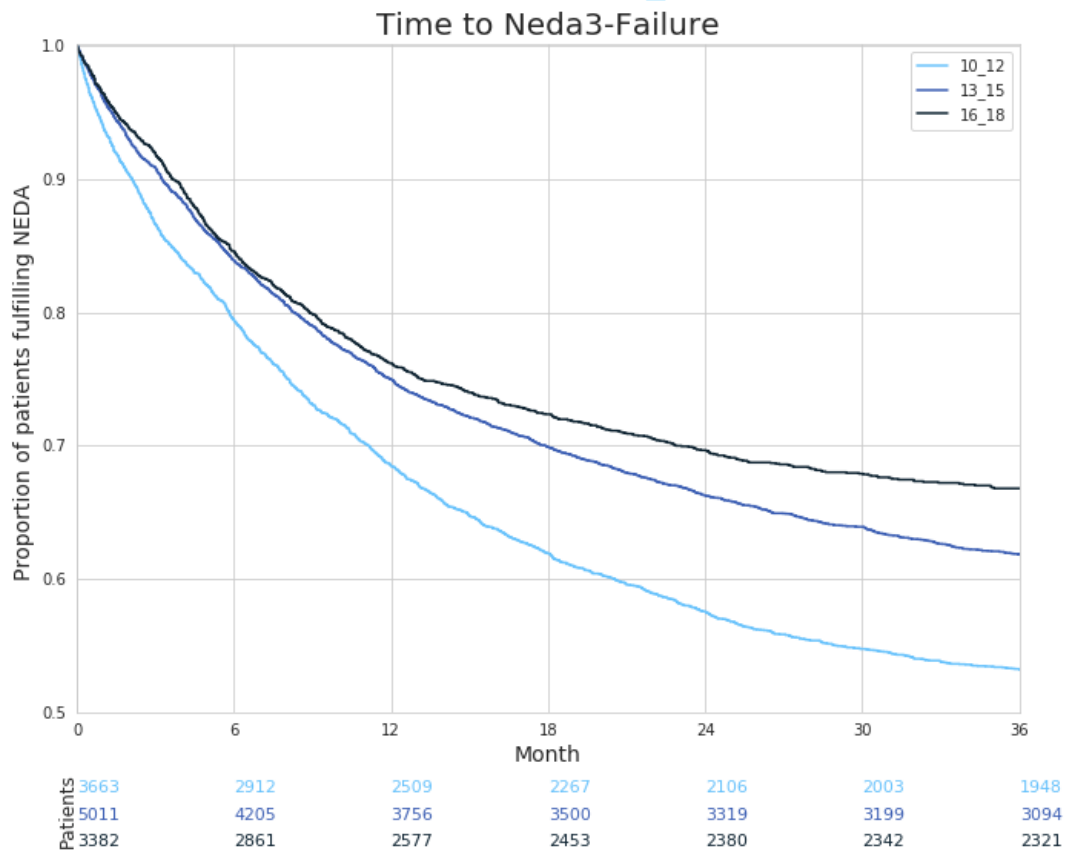

STROBE Statement—Checklist of items that should be included in reports of *cohort studies*

|                              | Item No | Recommendation                                                                                                                                                                                    |    |
|------------------------------|---------|---------------------------------------------------------------------------------------------------------------------------------------------------------------------------------------------------|----|
| <b>Title and abstract</b>    | 1       | (a) Indicate the study's design with a commonly used term in the title or the abstract                                                                                                            | ☺  |
|                              |         | (b) Provide in the abstract an informative and balanced summary of what was done and what was found                                                                                               | ☺  |
| <b>Introduction</b>          |         |                                                                                                                                                                                                   |    |
| Background/rationale         | 2       | Explain the scientific background and rationale for the investigation being reported                                                                                                              | ☺  |
| Objectives                   | 3       | State specific objectives, including any prespecified hypotheses                                                                                                                                  | ☺  |
| <b>Methods</b>               |         |                                                                                                                                                                                                   |    |
| Study design                 | 4       | Present key elements of study design early in the paper                                                                                                                                           | ☺  |
| Setting                      | 5       | Describe the setting, locations, and relevant dates, including periods of recruitment, exposure, follow-up, and data collection                                                                   | ☺  |
| Participants                 | 6       | (a) Give the eligibility criteria, and the sources and methods of selection of participants. Describe methods of follow-up                                                                        | ☺  |
|                              |         | (b) For matched studies, give matching criteria and number of exposed and unexposed                                                                                                               | NA |
| Variables                    | 7       | Clearly define all outcomes, exposures, predictors, potential confounders, and effect modifiers. Give diagnostic criteria, if applicable                                                          | ☺  |
| Data sources/<br>measurement | 8*      | For each variable of interest, give sources of data and details of methods of assessment (measurement). Describe comparability of assessment methods if there is more than one group              | ☺  |
| Bias                         | 9       | Describe any efforts to address potential sources of bias                                                                                                                                         | ☺  |
| Study size                   | 10      | Explain how the study size was arrived at                                                                                                                                                         | NA |
| Quantitative variables       | 11      | Explain how quantitative variables were handled in the analyses. If applicable, describe which groupings were chosen and why                                                                      | ☺  |
| Statistical methods          | 12      | (a) Describe all statistical methods, including those used to control for confounding                                                                                                             | ☺  |
|                              |         | (b) Describe any methods used to examine subgroups and interactions                                                                                                                               | ☺  |
|                              |         | (c) Explain how missing data were addressed                                                                                                                                                       | NA |
|                              |         | (d) If applicable, explain how loss to follow-up was addressed                                                                                                                                    | NA |
|                              |         | (e) Describe any sensitivity analyses                                                                                                                                                             | NA |
| <b>Results</b>               |         |                                                                                                                                                                                                   |    |
| Participants                 | 13*     | (a) Report numbers of individuals at each stage of study—eg numbers potentially eligible, examined for eligibility, confirmed eligible, included in the study, completing follow-up, and analysed | ☺  |
|                              |         | (b) Give reasons for non-participation at each stage                                                                                                                                              | NA |
|                              |         | (c) Consider use of a flow diagram                                                                                                                                                                | NA |
| Descriptive data             | 14*     | (a) Give characteristics of study participants (eg demographic, clinical, social) and information on exposures and potential confounders                                                          | ☺  |
|                              |         | (b) Indicate number of participants with missing data for each variable of interest                                                                                                               | ☺  |
|                              |         | (c) Summarise follow-up time (eg, average and total amount)                                                                                                                                       | ☺  |
| Outcome data                 | 15*     | Report numbers of outcome events or summary measures over time                                                                                                                                    | ☺  |
| Main results                 | 16      | (a) Give unadjusted estimates and, if applicable, confounder-adjusted estimates and their precision (eg, 95% confidence interval). Make clear which                                               | NA |

|                          |    |                                                                                                                                                                            |    |
|--------------------------|----|----------------------------------------------------------------------------------------------------------------------------------------------------------------------------|----|
|                          |    | confounders were adjusted for and why they were included                                                                                                                   |    |
|                          |    | (b) Report category boundaries when continuous variables were categorized                                                                                                  | ☺  |
|                          |    | (c) If relevant, consider translating estimates of relative risk into absolute risk for a meaningful time period                                                           | NA |
| Other analyses           | 17 | Report other analyses done—eg analyses of subgroups and interactions, and sensitivity analyses                                                                             | NA |
| <b>Discussion</b>        |    |                                                                                                                                                                            |    |
| Key results              | 18 | Summarise key results with reference to study objectives                                                                                                                   | ☺  |
| Limitations              | 19 | Discuss limitations of the study, taking into account sources of potential bias or imprecision. Discuss both direction and magnitude of any potential bias                 | ☺  |
| Interpretation           | 20 | Give a cautious overall interpretation of results considering objectives, limitations, multiplicity of analyses, results from similar studies, and other relevant evidence | ☺  |
| Generalisability         | 21 | Discuss the generalisability (external validity) of the study results                                                                                                      | NA |
| <b>Other information</b> |    |                                                                                                                                                                            |    |
| Funding                  | 22 | Give the source of funding and the role of the funders for the present study and, if applicable, for the original study on which the present article is based              | ☺  |

\*Give information separately for exposed and unexposed groups.

**Note:** An Explanation and Elaboration article discusses each checklist item and gives methodological background and published examples of transparent reporting. The STROBE checklist is best used in conjunction with this article (freely available on the Web sites of PLoS Medicine at <http://www.plosmedicine.org/>, Annals of Internal Medicine at <http://www.annals.org/>, and Epidemiology at <http://www.epidem.com/>). Information on the STROBE Initiative is available at <http://www.strobe-statement.org>.

# BMJ Open

**The impact of drug diversity on treatment effectiveness in relapsing-remitting multiple sclerosis (RRMS) in Germany between 2010 and 2018: real-world data from the German NeuroTransData Multiple sclerosis registry**

|                                 |                                                                                                                                                                                                                 |
|---------------------------------|-----------------------------------------------------------------------------------------------------------------------------------------------------------------------------------------------------------------|
| Journal:                        | <i>BMJ Open</i>                                                                                                                                                                                                 |
| Manuscript ID                   | bmjopen-2020-042480.R2                                                                                                                                                                                          |
| Article Type:                   | Original research                                                                                                                                                                                               |
| Date Submitted by the Author:   | 04-Jul-2021                                                                                                                                                                                                     |
| Complete List of Authors:       | Braune, Stefan; NeuroTransData GmbH<br>Rossnagel, Fabian; NeuroTransData GmbH<br>Dikow, Heidi; NeuroTransData GmbH<br>Bergmann, Arnfin; NeuroTransData GmbH<br>Study Group, NeuroTransData; NeuroTransData GmbH |
| <b>Primary Subject Heading</b>: | Neurology                                                                                                                                                                                                       |
| Secondary Subject Heading:      | Health services research, Patient-centred medicine, Qualitative research                                                                                                                                        |
| Keywords:                       | THERAPEUTICS, Adult neurology < NEUROLOGY, NEUROLOGY, Multiple sclerosis < NEUROLOGY                                                                                                                            |
|                                 |                                                                                                                                                                                                                 |

SCHOLARONE™  
Manuscripts



I, the Submitting Author has the right to grant and does grant on behalf of all authors of the Work (as defined in the below author licence), an exclusive licence and/or a non-exclusive licence for contributions from authors who are: i) UK Crown employees; ii) where BMJ has agreed a CC-BY licence shall apply, and/or iii) in accordance with the terms applicable for US Federal Government officers or employees acting as part of their official duties; on a worldwide, perpetual, irrevocable, royalty-free basis to BMJ Publishing Group Ltd ("BMJ") its licensees and where the relevant Journal is co-owned by BMJ to the co-owners of the Journal, to publish the Work in this journal and any other BMJ products and to exploit all rights, as set out in our [licence](#).

The Submitting Author accepts and understands that any supply made under these terms is made by BMJ to the Submitting Author unless you are acting as an employee on behalf of your employer or a postgraduate student of an affiliated institution which is paying any applicable article publishing charge ("APC") for Open Access articles. Where the Submitting Author wishes to make the Work available on an Open Access basis (and intends to pay the relevant APC), the terms of reuse of such Open Access shall be governed by a Creative Commons licence – details of these licences and which [Creative Commons](#) licence will apply to this Work are set out in our licence referred to above.

Other than as permitted in any relevant BMJ Author's Self Archiving Policies, I confirm this Work has not been accepted for publication elsewhere, is not being considered for publication elsewhere and does not duplicate material already published. I confirm all authors consent to publication of this Work and authorise the granting of this licence.

1  
2  
3 **The impact of drug diversity on treatment effectiveness in relapsing-remitting**  
4 **multiple sclerosis (RRMS) in Germany between 2010 and 2018: real-world data**  
5 **from the German NeuroTransData Multiple sclerosis registry**  
6  
7

8 **Stefan Braune<sup>1</sup>, Fabian Rossnagel<sup>1</sup>, Heidi Dikow<sup>1</sup>, Arnfin Bergmann<sup>1</sup>, NTD Study**  
9 **group<sup>1</sup>**  
10  
11

12  
13  
14 **Affiliations:**

15  
16 1 NeuroTransData German Doctors Network. Bahnhofstr 103b, 86633 Neuburg an der  
17 Donau, Germany  
18  
19

20  
21  
22 **Corresponding author:**

23  
24 **Prof. Dr. Stefan Braune**, Neurologist, NeuroTransData, Bahnhofstr. 103b, 86633  
25 Neuburg an der Donau, Germany  
26

27 Contact address: Neurozentrum Prien, Bernauer Str. 12, 83209 Prien  
28

29 Email: [sbraune@neurotransdata.com](mailto:sbraune@neurotransdata.com)

30 Phone: 0049-151 20746003

31 Fax: 0049-8051-64500  
32  
33

34  
35  
36 **Fabian Rossnagel**, Health economist, NeuroTransData, Bahnhofstr. 103b, 86633  
37 Neuburg an der Donau, Germany. [frossnagel@neurotransdata.com](mailto:frossnagel@neurotransdata.com)  
38

39 **Heidi Dikow**, Data scientist, NeuroTransData, Bahnhofstr. 103b, 86633 Neuburg an der  
40 Donau, Germany. [hdikow@neurotransdata.com](mailto:hdikow@neurotransdata.com)  
41

42 **Dr.med. Arnfin Bergmann**, Neurologist, NeuroTransData, Bahnhofstr. 103b, 86633  
43 Neuburg an der Donau, Germany. [abergmann@neurotransdata.com](mailto:abergmann@neurotransdata.com)  
44  
45

46 **NTD Study Group**, Doctors and study nurses of the German NeuroTransData network,  
47 see [www.neurotransdata.com/praxen](http://www.neurotransdata.com/praxen)  
48  
49  
50  
51  
52  
53  
54  
55  
56  
57  
58  
59  
60

## Abstract

### Objective

To evaluate the impact of drug diversity on treatment effectiveness in relapsing-remitting multiple sclerosis (RRMS) in Germany.

### Design

This study employs real world data captured in-time during clinical visits in 67 German neurology outpatient offices of the NeuroTransData (NTD) MS registry between 1 Jan 2010 and 30 Jun 2019, including 237,976 visits of 17,553 RRMS patients. Adherence and clinical effectiveness parameters were analyzed by descriptive statistics, time-to-event analysis overall and by disease modifying therapies (DMTs) stratified by administration modes (injectable, oral and infusion). Three time periods were compared: 2010–2012, 2013–2015, and 2016–2018.

### Results

Between 2010 and 2018, an increasing proportion of RRMS patients were treated with DMTs and treatment was initiated sooner after diagnosis of MS. Introduction of oral DMT temporarily induced higher readiness to switch. Comparing the three index periods, there was a continuous decrease of annualized relapse rates, less frequent EDSS progression and increasing periods without relapse, EDSS worsening and with stability of no-evidence-of-disease-activity (NEDA) 2 and 3 criteria, lower conversion rates to secondary progressive MS (SPMS) on oral and on injectable DMTs.

### Conclusion

Sparked by the availability of new mainly oral DMTs, RRMS treatment effectiveness improved clinically meaningful between 2010 and 2018. As similar effects were seen for injectable and oral DMTs more than for infusions, a better personalized treatment allocation in many patients is likely. These results indicate that there is an overall beneficial effect for the whole MS patient population as a result of the greater selection of available DMTs, a benefit beyond the head-to-head comparative efficacy, resulting from an increased probability and readiness to individualize MS therapy.

### Strengths and limitations

- The descriptive real world data study in patients with relapsing remitting multiple sclerosis (RRMS) evaluates overall effects of the increasing number of disease modifying therapies (DMTs) in multiple sclerosis (MS) on quality of clinical care between 2010 and 2018 in Germany
- Pseudonymized data of the German NeuroTransData registry are employed including the MS core data set as recommended by the European medical agency (EMA/548474/2017)



- Sufficient patient numbers, high frequency of visits, standardized webbased data capturing by trained staff, consistency of formats and definitions of the data over the study period and multiple data quality assurance steps mitigate the risks of errors and biases.
- Limitations to the study are the inclusion of only German RRMS outpatients, application of German DMT labels and regulatory specifications, varying follow-up times, immanent uncertainties of the exact time when RRMS switches into secondary progressive MS (SPMS) and the risk of residual confounding of the results by unknown confounders.

## Introduction

The field of multiple sclerosis (MS) treatment have seen dynamic developments over the last three decades. 1. Since the introduction of the first interferon- $\beta$ 1a (IF-b1a) in 1994, treatment options for patients with relapsing remitting MS (RRMS) have expanded to 14 different disease modifying therapies (DMTs) registered in Europe. 2. Regulatory authorities have defined new MS subgroups such as high-disease activity course of RRMS, relapsing MS (RMS), RRMS and relapsing forms of secondary progressive MS, for the definition of drug labels 3. Regulatory authorities have also developed legislative and administrative initiatives such as the “AMNOG procedure” to control costs of drugs, in the face of drug costs in Germany raising from €30.2 billion to €43.9 billion from 2010–2018.[1] 4. Patients, physicians and payers expect allocation of the most effective DMT for the individual patient while minimizing adverse events. While reduction of relapse activity was the treatment goal in the 1990s, current treatment goals strive for “no evidence of disease activity”.

However, little is known about the impact of these developments on real-world treatment pattern and effectiveness on disease activity in RRMS. This analysis investigates treatment pattern and effectiveness over time by comparing three time periods between 2010 and 2018 (defined by availability of new DMTs entering the German market) of real-world data from the physician’s network NeuroTransData (NTD) in Germany.

## Methods

### Database: the NTD multiple sclerosis registry

This project employed real-world clinical data captured by the NeuroTransData (NTD) multiple sclerosis registry. NTD is a Germany-wide physicians’ network founded in 2008 and run by physicians in the fields of neurology and psychiatry ([www.neurotransdata.com](http://www.neurotransdata.com)). Governance principles are defined. NTD generates revenue by its members’ participation in phase II–IV clinical trials, investigator initiated trials,

1  
2  
3 and real-world data analytic projects in cooperation with pharmaceutical industry,  
4 payers and other players in the German and international health systems.  
5

6  
7 Currently, 132 specialists work in 67 NTD practices throughout Germany, serving  
8 approximately 600,000 outpatients per year. Each practice is certified according to  
9 network-specific and ISO 9001 criteria. An external certified organization audits  
10 compliance annually. The NTD MS registry includes approximately 25,000 patients with  
11 MS, representing about 15% of all MS patients in Germany. NTD captures demographic,  
12 clinical history, patient-related outcomes, and clinical variables in real time during  
13 clinical visits. Standardized clinical assessments of functional system scores and EDSS  
14 calculation are performed by certified raters (<http://www.neurostatus.net>). Data are  
15 entered into the web-based registry either manually or directly from digital sources.  
16 Data quality is monitored by the NTD data management team, checking for  
17 inconsistencies and errors using an error analysis program. Both automatic and  
18 manually executed queries are implemented to further ensure data quality, e.g. checks  
19 for inconsistencies and requests for missing information. High data completeness is  
20 achieved by definition of minimum data sets, mandatory data entry fields, positive  
21 missing data confirmation. Advanced dynamic web-based data capturing, regular  
22 training of doctors and nurses, interactive chat forum for nurses and doctors, automated  
23 and manual feedback query system, daily-automated analysis of data plausibility and  
24 correctness, and annual on-site audit of procedures and source data by an external  
25 process quality certifier organization contribute to high data consistency. The NTD data  
26 capturing platform is also used as patient management system in the daily care of  
27 patients in NTD offices, thus guaranteeing timeliness of data.  
28  
29  
30  
31  
32  
33  
34  
35

36 All data are pseudonymized and pooled. The Institute for Medical Information  
37 Processing, Biometry and Epidemiology (Institut für medizinische  
38 Informationsverarbeitung, Biometrie und Epidemiologie (IBE)) at the Ludwig  
39 Maximilian University in Munich, Germany, manages codes and acts as an external trust  
40 center. Pooled data are stored on NTD servers and other NTD-controlled storage  
41 technology. Written informed consent is obtained from each patient contributing data  
42 for the registry. This data acquisition and management protocol was approved by the  
43 ethical committee of the Bavarian Medical Board (Bayerische Landesärztekammer, June  
44 14, 2012, ID 11144) and re-approved by the ethical committee of the Medical Board  
45 North-Rhine (Ärztekammer Nordrhein, April 25, 2017, ID 2017071). Compliance with  
46 European and German legislation (BDSG, EU-DSGVO) is warranted including patient  
47 rights and informed consent requirements. Patient participation, informed consent  
48 procedures, data capturing, management and analytics fulfill the “Guidelines for Good  
49 Pharmacoepidemiology Practices (GPP) of the International Society for  
50 Pharmacoepidemiology”[2], the Strengthening the Reporting of Observational Studies in  
51 Epidemiology (STROBE) guidelines[3], the European Medicines Agency requirements  
52 for the “Use of patient disease registries for regulatory purposes – methodological and  
53 operational considerations”[4] and the ethical principles laid down in the Declaration of  
54 Helsinki[5].  
55  
56  
57  
58  
59  
60

1  
2  
3 Data for this project were captured between 1 January 2010 and 30 June 2019.  
4  
5  
6

### 7 **Data quality of the NeuroTransData Multiple Sclerosis registry**

9  
10 The main components for data quality of medical real-world data registries proposed by  
11 European Medicine Agency[4] are fulfilled by the NTD MS registry. The NTD also  
12 realizes the quality criteria of the EunetHTA REQueST (Registry Evaluation and Quality  
13 Standards Tool)[6] with 14 of 14 points in section “Methodological Information”, 23 of  
14 24 points in section “Essential Standards” and 5 of 6 points in section “Additional  
15 Requirements”.  
16  
17

### 18 **Patient population**

19  
20  
21 All patients with diagnosis of relapsing-remitting or secondary progressive multiple  
22 sclerosis documented in the NTD MS registry between 01.01.2010 and 30.12.2018 with  
23 at least one clinical visit were included. In patients with RRMS the McDonald criteria as  
24 defined at the time of diagnosis of MS had to be fulfilled and documented in the registry.  
25 17,553 patients with RRMS were included.  
26  
27

28  
29 From this population 12,181 RRMS patients were identified in whom a DMT was  
30 initiated between 2010 and 2018. This group was stratified in three populations  
31 according to their time of initiation of DMT (see next section).  
32  
33

34  
35 As there is no accepted and validated diagnostic procedure to confirm SPMS, the  
36 generally applied diagnostic criteria for SPMS were applied by the treating neurologists  
37 to establish this diagnosis. Time of switch from RRMS to SPMS is defined as the first  
38 clinical visit, when in the treating neurologists’ judgement the criteria for manifest SPMS  
39 were fulfilled.  
40  
41

### 42 **Data analysis**

43  
44 Analysis was performed in 3 time periods, reflecting different spectra of DMTs available  
45 during the respective period.  
46  
47

48  
49 2010–2012 (index period 10–12): era of early treatment initiation at the stage of  
50 clinically isolated syndrome (CIS) with interferons and glatiramer acetate and escalation  
51 with natalizumab approved since 2006 and fingolimod approved since 2011 for high-  
52 disease-activity (HDA) patients. HDA is defined by the European Medicines Agency drug  
53 label as active disease despite treatment with at least one disease modifying therapy or  
54 disease activity with 2 or more disabling relapses in one year without therapy, and with  
55 1 or more Gadolinium enhancing lesions on brain MRI or a significant increase in T2  
56 lesion load as compared to a previous recent MRI.  
57  
58  
59  
60

1  
2  
3 2013–2015 (index period 13–15): era of therapy diversification with introduction of  
4 alemtuzumab as an infusion for HDA patients, teriflunomide and dimethyl fumarate as  
5 oral drugs for all stages of RRMS.  
6

7  
8 2016–2018 (index period 16–18): era of consolidated DMT spectrum. Cladribine, an oral  
9 HDA activity drug, was newly approved in August 2017. Daclizumab, which became  
10 available in July 2016, was restricted in July 2017 and withdrawn in March 2018, was  
11 not considered as numbers of patients were very small and a temporary distortion of  
12 results in the injectable group had to be excluded.  
13  
14

15 Parameters characterizing treatment acceptance and adherence were analysed for each  
16 index period.  
17

18  
19 Impact on treatment effectiveness was analyzed between 2010 and 2018 and for each  
20 index period for the strata “all DMT”, “injectables” including interferons- $\beta$ -1a,  
21 interferons- $\beta$ -1b, glatiramer acetate, “orals” including fingolimod, teriflunomide,  
22 dimethyl fumarate, cladribine, “infusions” including natalizumab, alemtuzumab, based  
23 on the European labels of these DMTs.  
24  
25

26  
27 Treatment effectiveness was analysed for RRMS patients on DMT by annualized relapse  
28 rate (ARR), time-to-first-relapse on DMT, percentage of patients with 6 months  
29 confirmed disability-progression (6mCDP, CDP defined as at least 1.0-point EDSS score  
30 increases for patients with baseline EDSS score 0–5.5 EDSS and at least 0.5-point EDSS  
31 score increases for patients with baseline EDSS score greater than 5.5), time-to-6mCDP  
32 on DMT, time-from-first symptom to EDSS  $\geq 3$ -5 and  $>5$  (in month), time-to-no-  
33 evidence-of-disease-activity (NEDA) 2 and 3 failure on DMT being started in the index  
34 periods. NEDA 2 is defined as no clinical evidence of relapse activity or disability  
35 progression. For NEDA 3 status no evidence of MRI activity, either new lesions or  
36 Gadolinium enhancing lesions, is required in addition to NEDA 2 criteria. Risk rates for  
37 discontinuation were calculated as ratio of number of patients with discontinuation of  
38 DMT divided by all patients.  
39  
40  
41  
42  
43  
44  
45

## 46 **Patient and Public Involvement**

47  
48 There was no patient involvement.  
49  
50

## 51 **Role of funding source**

52  
53  
54 This study was conducted by NTD without additional funding or guidance by external  
55 sponsors.  
56  
57  
58  
59  
60

## Results

### Data Quality

Exemplary frequencies of data captured constantly over time for several data items (see Table 1) underline the high data quality and consistency over time. The mean duration of follow-up was 5.07 years (SD 4.46). A total of 59,928 DMT treatment cycles were documented between 2010 and 2018.

**Table 1.** Numbers of patients with RRMS, visits per year and therapy cycles with DMTs captured in the NTD MS registry between 2010 and 2018. DMT, disease-modifying treatment; MRI, magnetic resonance imaging; RRMS, relapsing remitting multiple sclerosis.

| Index year        | Number RRMS patients | Visits documented per year | DMT cycles per year | Relapses per year | MRI per year |
|-------------------|----------------------|----------------------------|---------------------|-------------------|--------------|
| 2010              | 5,170                | 16,377                     | 4,168               | 1,821             | 3,096        |
| 2011              | 6,648                | 24,296                     | 5,441               | 2,638             | 4,004        |
| 2012              | 7,017                | 23,298                     | 5,893               | 2,600             | 3,107        |
| 2013              | 7,532                | 25,840                     | 6,410               | 2,433             | 3,866        |
| 2014              | 7,591                | 28,261                     | 7,536               | 2,076             | 3,989        |
| 2015              | 8,074                | 28,313                     | 7,443               | 1,972             | 3,879        |
| 2016              | 8,401                | 29,715                     | 7,566               | 1,795             | 3,781        |
| 2017              | 9,021                | 31,199                     | 7,862               | 1,707             | 3,575        |
| 2018              | 8,946                | 30,677                     | 7,609               | 1,487             | 4,102        |
| 2010–2018         |                      | 237,976                    | 59,928              | 18,529            | 33,399       |
| Mean/patient/year |                      | 3.48                       | 0.88                | 0.27              | 0.49         |

### Patient Population

A total of 17,553 patients with RRMS were identified between 2010 and 2018 (73.6% female, 26.4% male). Mean age at diagnosis of RRMS was 34 years (SD 10.66), mean annualized relapse rate between 2010 and 2018 was 0.27 (SD 0.6). From this group, in 12.181 patients a DMT was initiated in this period. Table 2 shows consistency and

completeness of data of this patient group stratified into the three time periods between 2010 and 2018.

**Table 2.** Means and percentages of RRMS patient characteristics of the NTD MS registry in time periods between 2010 and 2018 at initiation of DMT (=index event). DMT, disease-modifying therapy MRI, magnetic resonance imaging; RRMS, relapsing remitting multiple sclerosis; SD, standard deviation.

| Characteristic                             | 10-12<br>(N=3,942) | 13-15<br>(N=5,101) | 16-18<br>(N=3,138) | All patients<br>(N=12,181) |
|--------------------------------------------|--------------------|--------------------|--------------------|----------------------------|
| Female, %                                  | 73.17              | 73.74              | 71.86              | 73.07                      |
| Age, years (SD)                            | 44.95 (10.21)      | 43.93 (10.88)      | 40.7 (11.03)       | 43.59 (10.94)              |
| EDSS (SD)                                  | 2.12 (1.59)        | 2.10 (1.62)        | 1.89 (1.53)        | 2.05 (1.59)                |
| Relapses (SD) before index event           | 1.93 (2.55)        | 2.26 (2.63)        | 2.21 (2.67)        | 2.14 (2.62)                |
| Months MS duration (SD)                    | 87.78 (85.87)      | 101.78 (93.62)     | 98.73 (94.99)      | 96.46 (91.75)              |
| DMTs before index event (SD)               | 0.8 (1.01)         | 1.08 (1.14)        | 1.2 (1.26)         | 1.02 (1.14)                |
| MRI around index event, %                  | 39.93              | 43.5               | 37.38              | 40.77                      |
| MRI with progression around index event, % | 20.83              | 20.78              | 18.36              | 20.17                      |

### Treatment acceptance

Overall proportions of RRMS patients actively treated with DMT increased steadily: 10-12, 70.7%; 13-15, 78.1%; 16-18, 80.1%. Proportions of DMT types by application changed during the 3 time periods 10-12/13-15/16-18 with percentages of patients on injectables 88/69/46, orals 13/44/54, infusions 12/10/10. Total percentages per period exceed 100% as some patients received more than one DMT per period (see section "Persistence on DMT"). Proportions of RRMS patients receiving so-called high-disease activity DMTs increased continuously: 10-12, 23%; 13-15, 27%; 16-18, 31%.

### Initiation of DMT after diagnosis of RRMS

More patients started on a DMT within 6 months after diagnosis of RRMS (10-12, 62%; 13-15, 72%; 16-17, 66%), with shorter periods between first symptom and initiation of first DMT (10-12, 178  $\pm$  295 days; 13-15, 121  $\pm$  174 days; 16-18, 115  $\pm$  112 days). Orals were increasingly preferred as first DMT as they became available during the 3 periods of time 10-12/13-15/16-18 with percentages of patients on injectables 74/44/40, orals 19/52/55, infusions 7/4/5.



## Persistence on DMT

Availability of oral DMT increased the proportion of switches between DMTs from 16% of patients on treatment in 10–12 to 24% in 13–15, while in 16–18, 14% of patients on DMT switched. In parallel, time to discontinuation remained stable within these 3-years periods: in 10–12 mean time to discontinuation 8.49 months (SD 7.14); in 13–15, 8.10 months (SD 6.92); and in 16–18, 8.49 months (SD 7.71). There was a trend for patients staying longer on overall treatment for the most recent time period. This trend was driven by longer persistence of patients on infusion therapies in the most recent time period (Figure 1).

**Figure 1.** Time to discontinuation of DMTs in RRMS patients for time periods 2010–2012, 2013–2015, 2016–2018, all DMT (A) and by injectables (B), orals (C), infusions (D). DMT, disease-modifying treatments; RRMS, relapsing remitting multiple sclerosis

A all DMT

B Injectables

C Orals

D Infusions

Non-medical reasons for discontinuation, such as patients' perceptions and wishes, decreased over time from 71 to 51%. Lack of effectiveness is increased as a motivation for switching DMTs, as well as adverse events or pregnancy/family planning (Table 3).

**Table 3. Reasons overall and risk rates by application type of DMT for discontinuation for three time periods 2010–2012, 2013–2015, and 2016–2018.**

Non-medical reasons summarize patients' perceptions and wishes. DMT, disease-modifying treatment; NA, not applicable as criteria was not captured.

| <b>Reasons for discontinuation, %</b> | <b>10–12</b> | <b>13–15</b> | <b>16–18</b> |
|---------------------------------------|--------------|--------------|--------------|
| Antibodies/JCV-virus titer            | 1.28         | 1.85         | 1.51         |
| family planning                       | 4.10         | 5.48         | 6.34         |
| Adverse events                        | 5.13         | 15.89        | 13.12        |
| Lack of effectiveness                 | 18.21        | 19.31        | 27.90        |
| Freedom of disease activity           | NA           | 0.34         | 0.36         |
| Non-medical reasons                   | 71.28        | 57.11        | 50.76        |
| <b>Risk rates for discontinuation</b> |              |              |              |
| Injectables                           | 0.59         | 0.54         | 0.33         |
| Orals                                 | 0.39         | 0.36         | 0.21         |
| Infusions                             | 0.59         | 0.37         | 0.17         |

Risk rates for discontinuation decreased continuously for all types of DMT over the three time periods, reaching a decrease of 44% for injectables, 46% for orals and 71% for infusions between 2010–2012 and 2016–2018.

### DMT switching pattern

Patients increasingly switched from injectables to oral or infusion DMTs, while switches to injectables decreased. Follow-on DMTs after oral DMTs were predominantly oral DMT. If infusion therapy was discontinued, almost all patients continued with oral DMTs (see Figure 2).

**Figure 2.** Percentage of switches between injectable, oral and infusion DMTs in RRMS for time periods A) 2010–2012, B) 2013–2015, C) 2016–2018. DMT, disease-modifying therapy; RRMS, relapsing remitting multiple sclerosis.

A

B

C



## Treatment effectiveness

### Relapse activity

Annualized relapse rate (ARR) decreased by a mean 39% overall, 40% for injectables and 30% for orals. Infusion therapies did not decrease (Figure 3).

**Figure 3:** Annualized relapse rate in three time periods 2010–2012, 2013–2015, 2016–2018 on DMT overall and by application type. DMT, disease-modifying therapy.

Proportions of patients documented with 6mCDP, with progression of EDSS <3 to ≥3–5 as well as from EDSS <5 to ≥5 decreased by 39% and 23%, respectively, between the first and the last time period analyzed. In parallel, times from first symptom of RRMS to reach the defined EDSS ranges increased by 22% and 15% respectively (see Table 4).

**Table 4.** Six months confirmed disability progression (6m CDP. EDSS increase of ≥1.0 for patients from previous EDSS): proportion of patients reaching EDSS ≥3 to 5, reaching EDSS ≥5 and months from first symptom of RRMS to 6mCDP in these strata.

|                                          | EDSS <3 to | EDSS <5 to | Months to 6mCDP |       | Months to 6mCDP |        |
|------------------------------------------|------------|------------|-----------------|-------|-----------------|--------|
|                                          | ≥3–<5      | ≥5         | EDSS ≥3–5       |       | EDSS ≥5         |        |
|                                          | % patients | % patients | Mean            | SD    | Mean            | SD     |
| <b>10–12</b>                             | 1.02       | 0.26       | 122.30          | 81.03 | 181.59          | 92.17  |
| <b>13–15</b>                             | 0.76       | 0.31       | 130.95          | 85.60 | 181.37          | 110.04 |
| <b>16–18</b>                             | 0.62       | 0.20       | 149.26          | 93.32 | 209.73          | 97.70  |
| <b>Difference from 10–12 to 16–18, %</b> | -39        | -23        | +22             |       | +15             |        |

### Maintenance of NEDA 2 and 3 criteria

There was a clear trend that patients who initiated DMTs for a minimum of 3 months in these index periods remained more frequently and longer free of disease activity according to NEDA 2 (no relapse, no 6mCDP) and NEDA 3 (no relapse, no 6mCDP, no MRI progression) criteria over the three periods of time (Figure 4).

1  
2  
3 **Figure 4.** A. Time to failure of no-evidence-of disease-activity (NEDA) 2 (no relapse, no  
4 confirmed disability progression) and B. NEDA 3 (no relapse, no 6months confirmed  
5 disability progression, no MRI worsening) criteria in RRMS patients on DMTs after a  
6 minimum treatment period of 3 months with treatment initiation within three time  
7 periods 2010–2012, 2013–2015, 2016–2018. DMT, disease-modifying treatment; MRI,  
8 magnetic resonance imaging; RRMS, relapsing remitting multiple sclerosis.  
9  
10  
11  
12  
13

14 A.

15  
16  
17  
18 B.  
19  
20  
21  
22  
23  
24

25 Mean times to NEDA 2 and 3 failure, censored for the 3 time periods, increased  
26 continuously. NEDA 2: 10–12, 6.92 months (SD 6.66); 13–15, 7.10 months (SD 6.55);  
27 16–18, 7.43 months (SD 7.11). NEDA 3: 10–12, 6.70 months (SD 6.41); 13–15, 7.16  
28 months (SD 6.42); 16–18, 7.49 months (SD 6.89).  
29  
30  
31  
32

### 33 Progression to SPMS

34  
35 Between 2010 and 2018, overall 2.34% of 17,553 patients switched from RRMS to SPMS  
36 during a mean follow-up time of 5.31 years. The mean time from first symptom of MS to  
37 SPMS was 214 months (SD 113.77), almost 18 years. Time-to-SPMS progression analysis  
38 did not reveal time differences between the 3 index time periods (not shown here).  
39 There was a continuous trend towards lower numbers of patients switching to SPMS  
40 while on DMT for at least 12 months from 4.25% in 10–12, to 1.97% in 13–15, and to  
41 1.46% in 16–18.  
42  
43  
44  
45  
46  
47  
48  
49  
50  
51  
52  
53  
54  
55  
56  
57  
58  
59  
60

## Discussion

The increasing number of new oral and intravenous DMTs was associated with continuously greater proportions of RRMS patients being treated between 2010 and 2018 and with earlier initiation of first therapy after diagnosis of MS had been established. Orals were increasingly preferred as first and as switching therapies, reaching 55% and about 70% of treated patients, respectively. In the years 2013 to 2015 switching of DMTs increased by 50 % including 24% of all treated patients compared to the previous period 2010 to 2012 as well as later on between 2016 to 2018 showing 14%. Lack of effectiveness was seen as an incremental driving motivation to switch, as well as adverse events and pregnancy or family planning. This raised readiness to adapt DMTs to the clinical course achieved a sustained drop of ARRs, frequency of EDSS progression and 6mCDP leading to more frequent and longer periods free of disease activity as defined by NEDA 2 and 3 criteria. Although the proportions of patients, who progressed to SPMS on therapy continuously declined as new DMTs become available, the time-to-SPMS progression of the affected patients remained unchanged at about 214 months.

Medical guidelines, regulatory processes and public discussion in Germany and other countries regarding clinical benefits, treatment strategies and drug pricing are often focused on results from the randomized controlled trials (RCTs) with an active comparator and versus placebo that led to registration of the drug[7]. However, clinical usage in a broad natural spectrum of patients and the increasing complexity of treatment options are causing a knowledge gap that RCTs are unable to fill. Thus, qualified real-world-data (RWD) are increasingly employed to evaluate optimization of therapeutic strategies[8-11]. The attempt to translate DMT efficacy studies into evidence-based clinical practice by meta-analysis of 123 unique RRMS studies provided very limited results. One main limitation was the paucity of efficacy data beyond 3 years of treatment[12]. Other initiatives addressed methodological aspects of this efficacy-effectiveness gap between results of RCTs in selected patient groups and effectiveness in real-world usage[13]. This is the first study to address population effects of a series of newly introduced DMTs in RRMS on adherence and clinical effectiveness.

Transparent data quality is the key stone of any scientific project. The physician-owned NTD MS registry can demonstrate constant data density, including a mean of 3.5 patient visits documented over the last 9 years, based on a defined minimal dataset and high data quality. This was achieved by utilization of web-based in-time data capturing and continuous development of automated and manual quality assurance measures for capturing data from 8,000 to 9,000 RRMS outpatients per year in Germany.

Definition criteria of the three time periods chosen for this study are thought to reflect periods characterized by different sets of DMTs being available for the treatment of RRMS patients. Between 2010 and 2018 the broader spectrum, in particular of oral DMTs motivated more patients to initiate DMT treatment and also to start earlier after diagnosis of RRMS. Availability of oral DMTs temporarily increased switches between

DMTs in the years after their introduction from 16% in 2010–2012 to 24% of patients on DMT in 2013–2015, with a decline back to 14% of patients switching between 2016 and 2018. This is also reflected in the time-to-discontinuation analysis, showing more frequent and quicker discontinuation of injectables in 2013–2015. Lack of effectiveness and adverse events seem to have gained in importance over time as reasons for discontinuation of DMT, mirroring increasing expectations of doctors and patients regarding benefit/risk of DMTs. Persistence on classes of DMTs after 3 years improved most noticeable for infusions moving from 50% in 2010–2012 to almost 80% in 2015–2018, injectables increasing from less than 10% to 60% and orals achieving stable persistence of about 72%. Risk rates for discontinuation decreased overall and for each application type. This suggests that over time the individual selection of efficient and well tolerated DMTs succeeds more often in all application modes of DMTs if a broader selection and better acceptance of substances is available.

Earlier initiation of treatment and more readiness to search for individual optimal therapy by switching between a greater diversity of drugs seems to have impacted treatment effectiveness. ARR decreased overall and for patients on injectables and orals approximately 30–40% between 2010–2012 and 2016–2018. However, there was no change in ARR over time for infusions. Furthermore, worsening of disability could be controlled better in parallel. The proportion of patients with EDSS reaching total sum scores >3 and > 5 decreased by 39% and 23%, respectively, and times from diagnosis to the 6mCDPs increased by 22 and 15%, respectively, when comparing time periods 2010–2012 and 2016–2018.

Comparing treatment cycles initiated in these 3 time periods, these positive developments are also reflected by continuously increasing proportions of patients maintaining NEDA 2 and NEDA 3 criteria. In addition, proportions of patients on DMT switching from RRMS to SPMS decreased each time period, but mean times to SPMS from diagnosis of RRMS remained unchanged at 17.8 years, corresponding with previous published data with a conversion time to SPMS on active treatment of 16.8 years [14]. The potential risk reduction for SPMS conversion on a broad spectrum of DMTs will have to be reevaluated in more detail as longer observation times on the new therapies become available.

The parallel improvements of reduction in ARR and disability progression, longer maintenance of NEDA 2 and 3 status in all types of DMTs, independent of their application modes, indicate that the broader selection of DMTs enable a better individual disease control in RRMS. It can be reasonably assumed that the regulatory introduced definition of high-disease-activity-labels further supported a more stringent application of the therapeutic options available. As expected, better treatment is associated with longer persistence. The observation that more efficient therapies achieved lower relapse activity in parallel with slower disability progression and longer persistence on DMTs is in line with a previous MSBase registry-based report in smaller groups of RRMS patients with advanced EDSS scores between 3 and 6[15], as well as more recent data in earlier disease stages[16]. Beside the individual patient's fate, this is

1  
2  
3 of great socioeconomic relevance, as costs and utility in MS are highly correlated with  
4 disease severity[17] and progression inducing disease activity[18]. In contrast,  
5 continuing interferon- $\beta$  and glatiramer acetate therapy 10 years or longer without  
6 optimization of therapy in response to disease activity results in an inevitable, almost  
7 linear increase in mean EDSS[19].  
8  
9

10 This study demonstrates a clinically meaningful, population-based benefit resulting  
11 from the availability of a broader selection of DMTs over time. The introduction of oral  
12 DMTs sparked a dynamic development between 2013 and 2015 with temporarily higher  
13 proportions of DMT switches but also more readiness to initiate DMTs earlier after  
14 diagnosis of MS. The similar extent of improvement of effectiveness parameter for oral  
15 and injectable DMTs demonstrates that this population effect is based on a more  
16 effective personalized allocation in individual patients.  
17  
18  
19

20 This study is descriptive by definition. Limitations to the study are the inclusion of only  
21 German RRMS outpatients, application of German DMT labels and regulatory  
22 specifications. The role of attrition bias due to varying follow-up times can not be ruled  
23 out, but constant mean times to discontinuation seem to reduce the risk. By including all  
24 RRMS patients giving informed consent and as distributions of clinical characteristics  
25 are balanced, indication or selection bias appear to be mitigated. Although the  
26 established data sets to characterise patients and clinical course in MS were employed  
27 the risk of residual confounding of results by unknown confounders remains. As there is  
28 no validated, generally accepted definition of SPMS, the diagnosis of SPMS is made by  
29 clinical judgement of the treating physician based on best clinical knowledge, but  
30 remains per definition retrospective.  
31  
32  
33  
34  
35

36 In conclusion, these descriptive results seem to indicate that there is an overall  
37 beneficial effect for the whole MS patient population as a result of the greater selection  
38 of available DMTs, a benefit beyond the head-to-head comparative efficacy, seemingly  
39 driven by an increased probability and readiness to individualize MS therapy by doctors  
40 and patients. Nevertheless, the challenge in daily practice is the timely identification of  
41 the individually most effective DMT at a given time during the course of MS, particularly  
42 in patients with persistent disease activity on their current DMT, especially regarding  
43 the immanent risk of developing progressive disability or SPMS. Promising techniques  
44 emerge based on biomarker like neurofilament light chain[20] or B-cell activity  
45 response[21] or real-world-data-based statistical predictive algorithms[22]. As  
46 treatment decisions are driven currently by European label definitions, national cost  
47 control regulations and perceptions of physicians and patients, personalized-data-based  
48 decision support is required to further improve individual care.  
49  
50  
51  
52  
53  
54  
55  
56

### 57 **Contributorship statement**

58  
59 SB planned the study, analysis and wrote the manuscript. FR assisted the data analysis,  
60 interpretation of results and drafting of the manuscript. HD performed the statistical

1  
2  
3 analysis and aided data interpretation. AB aided in interpreting the results and worked  
4 on the manuscript. NTD study group collected the data, performed data cleansing and  
5 data extraction from the NTD MS registry. All authors discussed the results and  
6 commented on the manuscript.  
7  
8  
9

## 10 11 **Competing interests**

12  
13 All authors declare that they have no competing interests.  
14  
15

## 16 17 **Funding**

18  
19 This project was founded by the NeuroTransdata network itself without external  
20 resources.  
21  
22

## 23 24 **Data sharing statement**

25  
26 This project used deidentified patient data, owned by the participating doctors and  
27 provided for use in the NeuroTransData MS registry. Data can be made available upon  
28 reasonable request.  
29  
30  
31  
32  
33  
34  
35  
36

## 37 38 **References**

- 39 1. Statista 2020. <https://de.statista.com/statistik/daten/studie/158096/umfrage/pharmagesamtmarkt-umsatzentwicklung-seit-2006/>
  - 40 2. Public Policy Committee, International Society of Pharmacoepidemiology. Guidelines for  
41 good pharmacoepidemiology practice (GPP). *Pharmacoepidemiology and drug safety*  
42 2016;25:2-10.
  - 43 3. von Elm E, Altman DG, Egger M, *et al*. The Strengthening the Reporting of Observational  
44 Studies in Epidemiology (STROBE) statement: guidelines for reporting observational  
45 studies. *Lancet*. 2007;370(9596):1453-7.
  - 46 4. The Cross-Committee Task Force on Patient Registries. Discussion paper: Use of patient  
47 disease registries for regulatory purposes – methodological and operational  
48 considerations. *EMA/763513/2018*.  
49 [https://www.ema.europa.eu/documents/other/discussion-paper-use-patient-disease-  
50 registries-regulatory-purposes-methodological-operational\\_en.docx](https://www.ema.europa.eu/documents/other/discussion-paper-use-patient-disease-registries-regulatory-purposes-methodological-operational_en.docx).
  - 51 5. World Medical Association. WMA Declaration of Helsinki – Ethical Principles for Medical  
52 Research Involving Human Subjects. [https://www.wma.net/policies-post/wma-  
53 declaration-of-helsinki-ethical-principles-for-medical-research-involving-human-  
54 subjects/](https://www.wma.net/policies-post/wma-declaration-of-helsinki-ethical-principles-for-medical-research-involving-human-subjects/)
- 55  
56  
57  
58  
59  
60



- 1
  - 2
  - 3
  - 4
  - 5
  - 6
  - 7
  - 8
  - 9
  - 10
  - 11
  - 12
  - 13
  - 14
  - 15
  - 16
  - 17
  - 18
  - 19
  - 20
  - 21
  - 22
  - 23
  - 24
  - 25
  - 26
  - 27
  - 28
  - 29
  - 30
  - 31
  - 32
  - 33
  - 34
  - 35
  - 36
  - 37
  - 38
  - 39
  - 40
  - 41
  - 42
  - 43
  - 44
  - 45
  - 46
  - 47
  - 48
  - 49
  - 50
  - 51
  - 52
  - 53
  - 54
  - 55
  - 56
  - 57
  - 58
  - 59
  - 60
6. European Network for Health Technology Assessment. REQueST® tool and its Vision paper. Public Consultation. <https://eunethta.eu/request-tool-and-its-vision-paper-are-now-available-for-public-consultation/>
  7. Wieseler B, McGauran N, Kaiser T. New drugs: where did we go wrong and what can we do better? *BMJ* 2019;366:l4340.
  8. Paolicelli D, Lucisano G, Manni A, *et al.* Retrospectively acquired cohort study to evaluate the long-term impact of two different treatment strategies on disability outcomes in patients with relapsing multiple sclerosis (RE.LO.DI.MS): data from the Italian MS Register. *J Neurol.* 2019;266(12):3098-3107.
  9. Boremalm M, Juto A, Axelsson M, *et al.* Natalizumab, rituximab and fingolimod as escalation therapy in multiple sclerosis. *Eur J Neurol.* 2019;26(8):1060-1067.
  10. Braune S, Grimm S, van Hövell P, *et al.* Comparative effectiveness of delayed-release dimethyl fumarate versus interferon, glatiramer acetate, teriflunomide, or fingolimod: results from the German NeuroTransData registry. *J Neurol.* 2018;265(12):2980-2992.
  11. Kalincik T, V. Jokubaitis, T. Spelman, *et al.* Cladribine versus fingolimod, natalizumab and interferon  $\beta$  for multiple sclerosis. *Mult. Scler* 2018;24(12):1617-1626.
  12. Claflin SB, Broadley S, Taylor BV. The effect of disease modifying therapies on disability progression in multiple sclerosis: a systematic overview of meta-analyses. *Front. Neurol* 2019;9: article 1150.
  13. Egger M, Moons KGM, Fletcher C. GetReal: from efficacy in clinical trials to relative effectiveness in the real world. *Research Synthesis Methods* 2016;7(3):278-281
  14. Cree BAC, Gourrad PA, Oksenberg JR *et al.* Long-term evolution of multiple sclerosis disability in the treatment era. *Ann Neurol* 2016; 80:499-510
  15. Lizak N, Lugaresi A, Alroughani R, *et al.* Highly active immunomodulatory therapy ameliorates accumulation of disability in moderately advanced and advanced multiple sclerosis. *J Neurol Neurosurg Psychiatry* 2017;88:196–203.
  16. Lublin FD, Baier M, Cutter G. Effect of relapses on development of residual deficit in multiple sclerosis. *Neurology* 2003;61:1528–32.
  17. Kobelt G, Thompson A, Berg J, *et al.* M. New insights into the burden and costs of multiple sclerosis in Europe. *Multiple Sclerosis Journal* 2017;23(8):1123–1136
  18. Ness NH, Schriefer D, Haase R, *et al.* Differentiating societal costs of disability worsening in multiple sclerosis. *J Neurol* 2019; 267(4):1035-1042.
  19. Palace J, Duddy M, Lawton M, *et al.* Assessing the long-term effectiveness of interferonbeta and glatiramer acetate in multiple sclerosis: final 10-year results from the UK multiple sclerosis risksharing scheme. *J Neurol Neurosurg Psychiatry* 2019;90:251–260.
  20. Kuhle J, Kropshofer H, Haering DA, *et al.* Blood neurofilament light chain as a biomarker of MS disease activity and treatment response. *Neurology* 2019;92:e1007-e1015.
  21. Tacke S, Braune S, Rovituso DM, *et al.* In vivo B-cell activity predicts response to treatment with glatiramer acetate and interferons in patients with relapsing-remitting multiple sclerosis (RRMS). *Neurology: Neuroimmunology & Neuroinflammation* 2021; 8/3: in print
  22. Stuehler E, Braune S, Lionetto F, *et al.* Framework for personalized prediction of treatment response in relapsing remitting multiple sclerosis. *BMC Medical Research Methodology* 2020;20(1):24.

1  
2  
3  
4  
5  
6  
7  
8  
9  
10  
11  
12  
13  
14  
15  
16  
17  
18  
19  
20  
21  
22  
23  
24  
25  
26  
27  
28  
29  
30  
31  
32  
33  
34  
35  
36  
37  
38  
39  
40  
41  
42  
43  
44  
45  
46  
47  
48  
49  
50  
51  
52  
53  
54  
55  
56  
57  
58  
59  
60

For peer review only



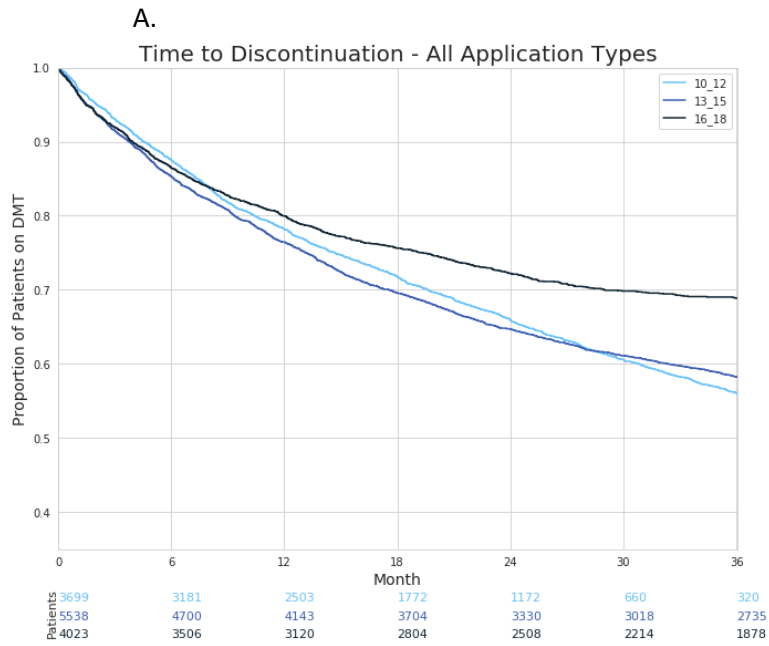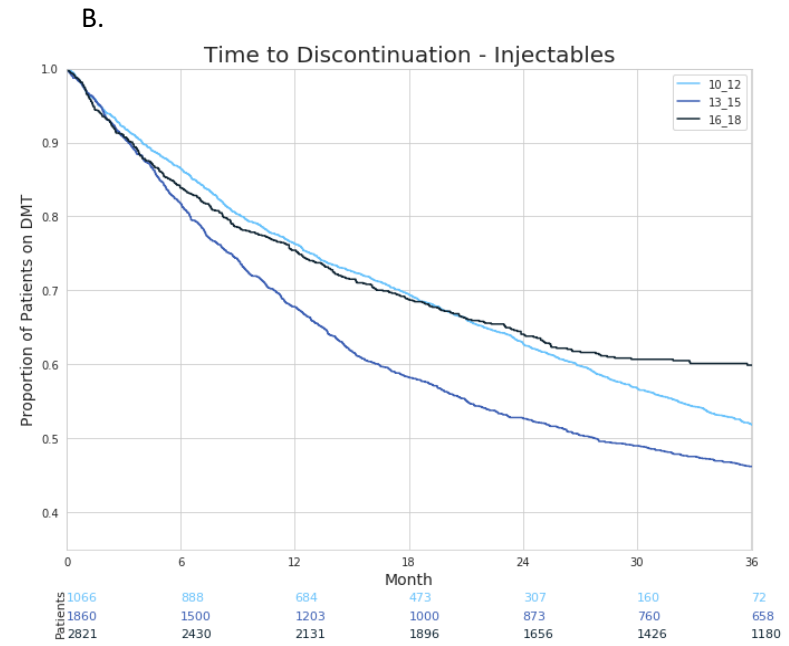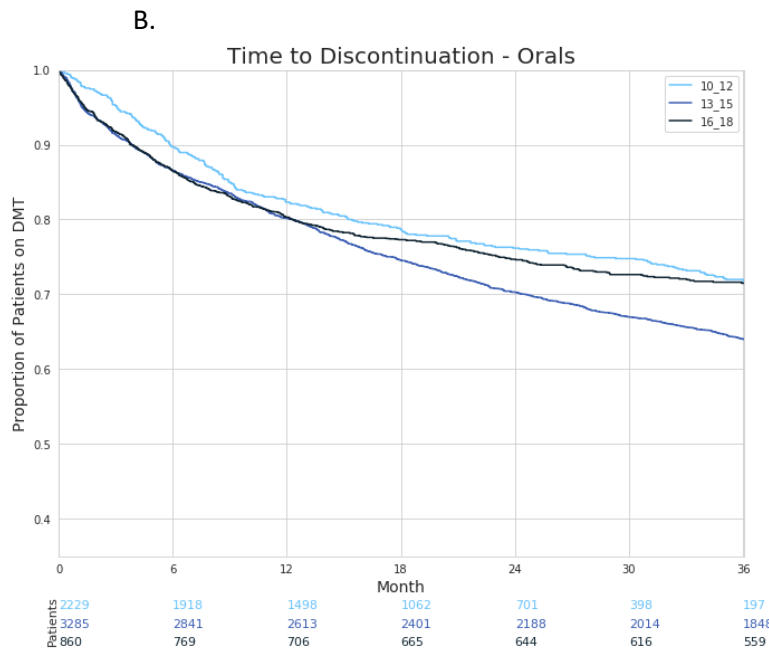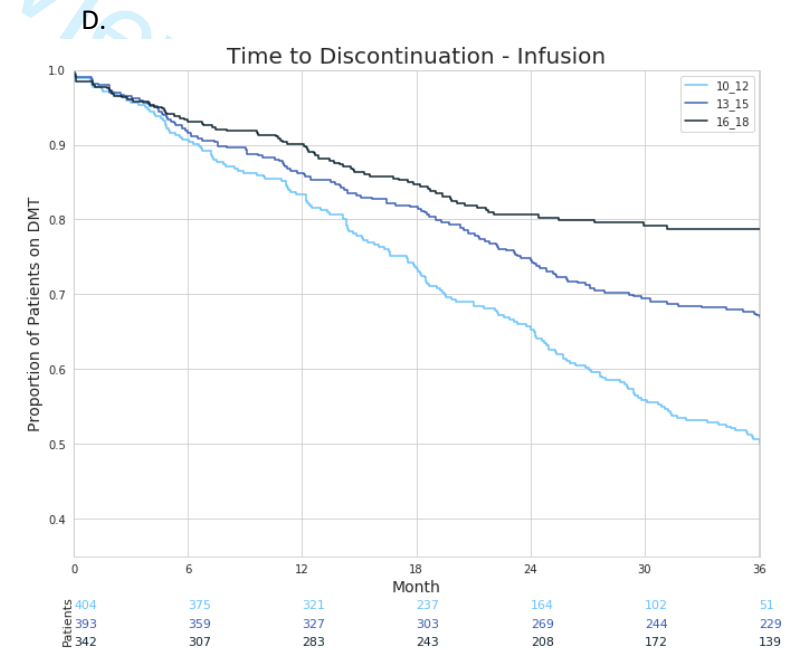

Switchers in Index Period: 10\_12

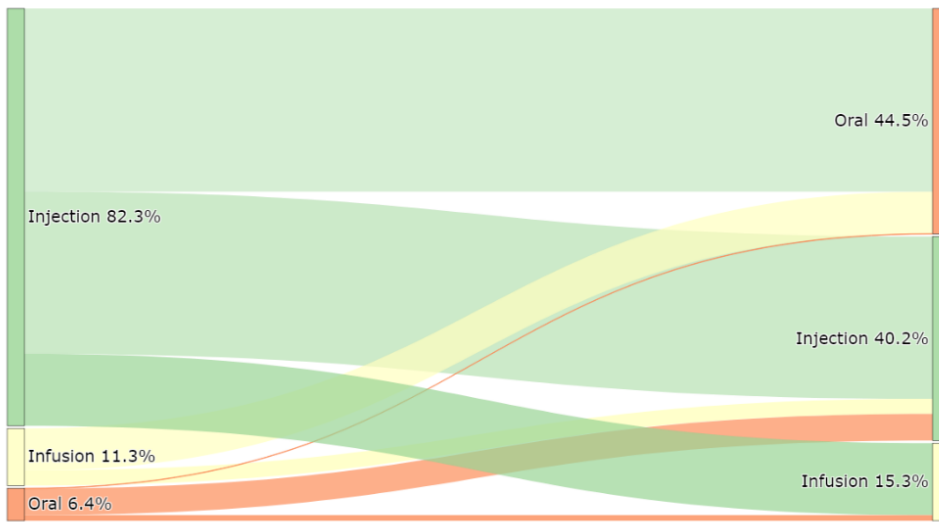

Switchers in Index Period: 13\_15

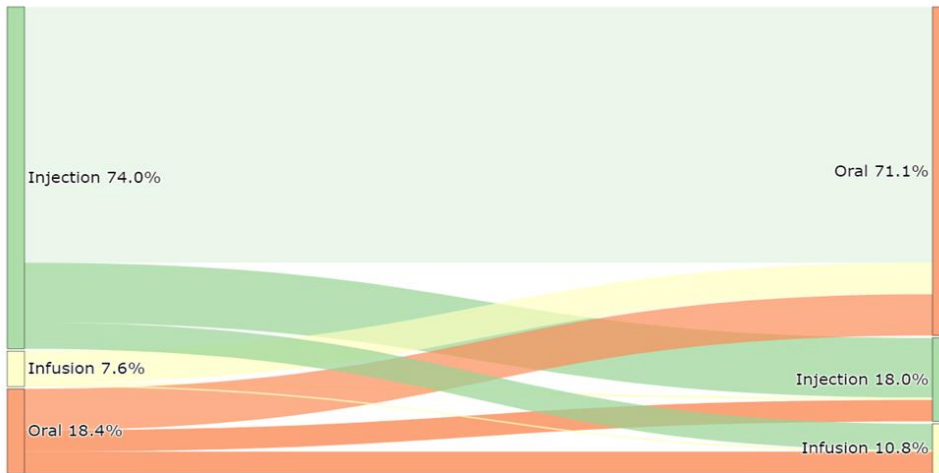

Switchers in Index Period: 16\_18

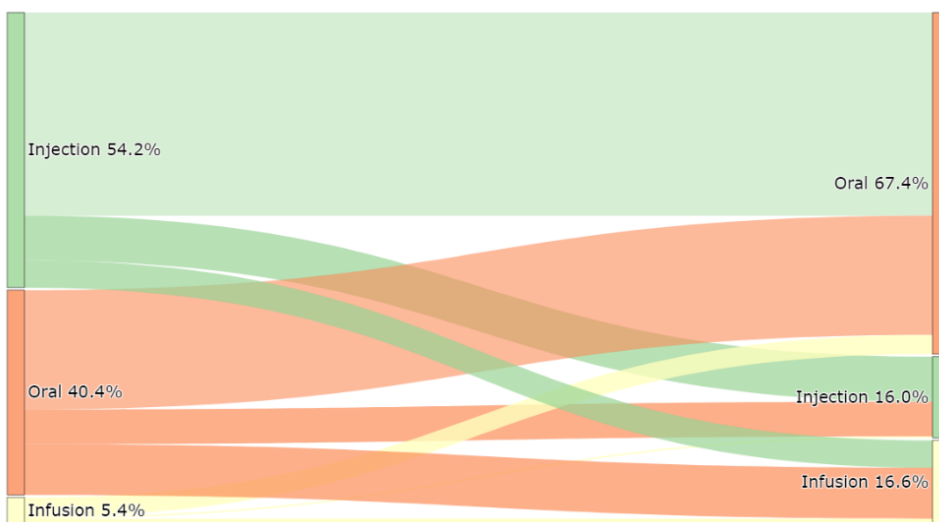



A.



B.



STROBE Statement—Checklist of items that should be included in reports of *cohort studies*

|                              | Item No | Recommendation                                                                                                                                                                                    |    |
|------------------------------|---------|---------------------------------------------------------------------------------------------------------------------------------------------------------------------------------------------------|----|
| <b>Title and abstract</b>    | 1       | (a) Indicate the study's design with a commonly used term in the title or the abstract                                                                                                            | ☺  |
|                              |         | (b) Provide in the abstract an informative and balanced summary of what was done and what was found                                                                                               | ☺  |
| <b>Introduction</b>          |         |                                                                                                                                                                                                   |    |
| Background/rationale         | 2       | Explain the scientific background and rationale for the investigation being reported                                                                                                              | ☺  |
| Objectives                   | 3       | State specific objectives, including any prespecified hypotheses                                                                                                                                  | ☺  |
| <b>Methods</b>               |         |                                                                                                                                                                                                   |    |
| Study design                 | 4       | Present key elements of study design early in the paper                                                                                                                                           | ☺  |
| Setting                      | 5       | Describe the setting, locations, and relevant dates, including periods of recruitment, exposure, follow-up, and data collection                                                                   | ☺  |
| Participants                 | 6       | (a) Give the eligibility criteria, and the sources and methods of selection of participants. Describe methods of follow-up                                                                        | ☺  |
|                              |         | (b) For matched studies, give matching criteria and number of exposed and unexposed                                                                                                               | NA |
| Variables                    | 7       | Clearly define all outcomes, exposures, predictors, potential confounders, and effect modifiers. Give diagnostic criteria, if applicable                                                          | ☺  |
| Data sources/<br>measurement | 8*      | For each variable of interest, give sources of data and details of methods of assessment (measurement). Describe comparability of assessment methods if there is more than one group              | ☺  |
| Bias                         | 9       | Describe any efforts to address potential sources of bias                                                                                                                                         | ☺  |
| Study size                   | 10      | Explain how the study size was arrived at                                                                                                                                                         | NA |
| Quantitative variables       | 11      | Explain how quantitative variables were handled in the analyses. If applicable, describe which groupings were chosen and why                                                                      | ☺  |
| Statistical methods          | 12      | (a) Describe all statistical methods, including those used to control for confounding                                                                                                             | ☺  |
|                              |         | (b) Describe any methods used to examine subgroups and interactions                                                                                                                               | ☺  |
|                              |         | (c) Explain how missing data were addressed                                                                                                                                                       | NA |
|                              |         | (d) If applicable, explain how loss to follow-up was addressed                                                                                                                                    | NA |
|                              |         | (e) Describe any sensitivity analyses                                                                                                                                                             | NA |
| <b>Results</b>               |         |                                                                                                                                                                                                   |    |
| Participants                 | 13*     | (a) Report numbers of individuals at each stage of study—eg numbers potentially eligible, examined for eligibility, confirmed eligible, included in the study, completing follow-up, and analysed | ☺  |
|                              |         | (b) Give reasons for non-participation at each stage                                                                                                                                              | NA |
|                              |         | (c) Consider use of a flow diagram                                                                                                                                                                | NA |
| Descriptive data             | 14*     | (a) Give characteristics of study participants (eg demographic, clinical, social) and information on exposures and potential confounders                                                          | ☺  |
|                              |         | (b) Indicate number of participants with missing data for each variable of interest                                                                                                               | ☺  |
|                              |         | (c) Summarise follow-up time (eg, average and total amount)                                                                                                                                       | ☺  |
| Outcome data                 | 15*     | Report numbers of outcome events or summary measures over time                                                                                                                                    | ☺  |
| Main results                 | 16      | (a) Give unadjusted estimates and, if applicable, confounder-adjusted estimates and their precision (eg, 95% confidence interval). Make clear which                                               | NA |

|                          |    |                                                                                                                                                                            |    |
|--------------------------|----|----------------------------------------------------------------------------------------------------------------------------------------------------------------------------|----|
|                          |    | confounders were adjusted for and why they were included                                                                                                                   |    |
|                          |    | (b) Report category boundaries when continuous variables were categorized                                                                                                  | ☺  |
|                          |    | (c) If relevant, consider translating estimates of relative risk into absolute risk for a meaningful time period                                                           | NA |
| Other analyses           | 17 | Report other analyses done—eg analyses of subgroups and interactions, and sensitivity analyses                                                                             | NA |
| <b>Discussion</b>        |    |                                                                                                                                                                            |    |
| Key results              | 18 | Summarise key results with reference to study objectives                                                                                                                   | ☺  |
| Limitations              | 19 | Discuss limitations of the study, taking into account sources of potential bias or imprecision. Discuss both direction and magnitude of any potential bias                 | ☺  |
| Interpretation           | 20 | Give a cautious overall interpretation of results considering objectives, limitations, multiplicity of analyses, results from similar studies, and other relevant evidence | ☺  |
| Generalisability         | 21 | Discuss the generalisability (external validity) of the study results                                                                                                      | NA |
| <b>Other information</b> |    |                                                                                                                                                                            |    |
| Funding                  | 22 | Give the source of funding and the role of the funders for the present study and, if applicable, for the original study on which the present article is based              | ☺  |

\*Give information separately for exposed and unexposed groups.

**Note:** An Explanation and Elaboration article discusses each checklist item and gives methodological background and published examples of transparent reporting. The STROBE checklist is best used in conjunction with this article (freely available on the Web sites of PLoS Medicine at <http://www.plosmedicine.org/>, Annals of Internal Medicine at <http://www.annals.org/>, and Epidemiology at <http://www.epidem.com/>). Information on the STROBE Initiative is available at <http://www.strobe-statement.org>.
